# Supplementary material
Source: publisher figshare collection journal article supplement (https://acs.figshare.com/ndownloader/files/17568953)
Supplement: Supplementary file 1 [file 17568953]

**Supplemental Information**  
**Disentangling the Complex Vibrational Mechanics of the Protonated Water Trimer**  
**by Rational Control of Its Hydrogen Bonds**

Chinh H. Duong<sup>a</sup>, Nan Yang<sup>a</sup>, and Mark A. Johnson<sup>a,\*</sup>

<sup>a</sup>Sterling Chemistry Laboratory, Yale University, New Haven, Connecticut 06520, USA

Ryan J. DiRisio,<sup>b</sup> Anne B. McCoy<sup>b,\*</sup>

<sup>b</sup>Department of Chemistry, University of Washington, Seattle, Washington 98195, USA

Qi Yu,<sup>c</sup> Joel M. Bowman<sup>c,\*</sup>

<sup>c</sup>Department of Chemistry and Cherry L. Emerson Center for Computational Science, Emory University, Atlanta, Georgia 30322, USA

\*Corresponding Authors:

M. A. Johnson. Tel: +1 203 432 5226, Email: [mark.johnson@yale.edu](mailto:mark.johnson@yale.edu)

A. B. McCoy. Tel: +1 206 543 7464, Email: [abmccoy@uw.edu](mailto:abmccoy@uw.edu)

J. M. Bowman. Tel: +1 404 727 6592, Email: [jmbowma@emory.edu](mailto:jmbowma@emory.edu)

**Contents:**

- Figure S1. A comparison of the **3D** bare spectrum, VSCF/VCI calculated spectra, and CCSD(T) harmonic spectra.
- Figure S2. Comparison of the vibrational predissociation spectra of **3H** bare with **3H**·Ar and **3H**·D<sub>2</sub> tags.
- Figure S3. Comparison of the vibrational predissociation spectra of **3D**·D<sub>2</sub> with the wavenumber scaled **3H**·D<sub>2</sub>.
- Figure S4. Comparison of experimental spectra for **3H**·X, **3D**·X, **2H**·MeOH·H<sub>2</sub>, and **2H**·EtOH·H<sub>2</sub>, where X=Ar, D<sub>2</sub>, N<sub>2</sub>, CO (blue) to the aug-cc-pVDZ anharmonic (VPT2) spectra (red).
- Figure S5. Vibrational predissociation spectrum of the **3D**·D<sub>2</sub> and the partially deuterated experiments **3D<sub>6</sub>H**·D<sub>2</sub>, along with the double resonance depletion spectra and VSCF/VCI calculations isolating each isotopologue.
- Table S1. Optimized structures for the protonated water trimer and its various adducts obtained at the MP2/aug-cc-pVDZ level of theory and basis.
- Table S2. Table of proton affinities gathered from NIST.
- Table S3. Band labels and experimental frequencies for **3H**·X where X=Ar, D<sub>2</sub>, N<sub>2</sub>, CO, and H<sub>2</sub>O and VSCF/VCI frequencies and assignments for **3H**.
- Table S4. Band labels, experimental frequencies and VPT2 frequencies and assignments for **2H**·MeOH·H<sub>2</sub> and **2H**·EtOH·H<sub>2</sub>.

|             |                                                                                                                                                                                       |
|-------------|---------------------------------------------------------------------------------------------------------------------------------------------------------------------------------------|
| Table S5.   | Band labels and experimental frequencies for <b>3D</b> ·X, where X=D <sub>2</sub> , N <sub>2</sub> , CO and D <sub>2</sub> O and VSCF/VCI frequencies and assignments for <b>3D</b> . |
| Table S6.   | Table of the frequencies and intensities of vibrational features predicted from VPT2 for the protonated water trimer and its various adducts.                                         |
| Table S7.   | Band labels and experimental frequencies, and VSCF/VCI frequencies and assignments for <b>3D<sub>6</sub>H</b> ·D <sub>2</sub> and its three isotopologues.                            |
| Table S8.   | The matrix elements for the F-G analysis of the coupling between the out-of-phase shared proton stretch and the two bending modes.                                                    |
| Table S9.   | Frequencies obtained by performing a F-G analysis using the matrix elements provided in Table S8.                                                                                     |
| Methods S1. | Additional discussion of the VPT2 approach taken in this study and the interpretation of the results.                                                                                 |
| Methods S2. | Description of the diffusion Monte Carlo approach used to obtain the anharmonic band origin for the zero-order H-bonded OH stretch fundamental.                                       |

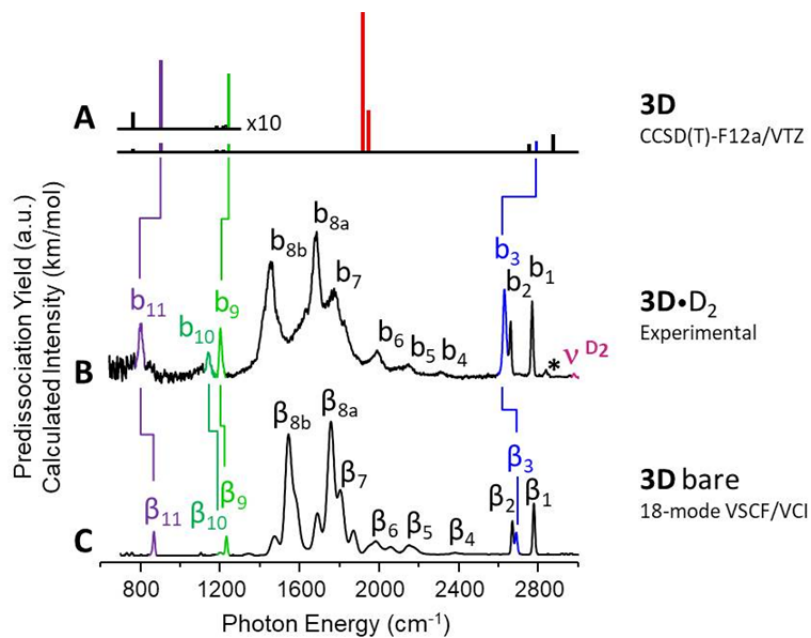

**Figure S1.** Comparison of the (A) CCSD(T)-F12a/VTZ harmonic spectrum, (B) D<sub>2</sub>-tagged vibrational predissociation spectrum, and (C) 18-mode VSCF/VCI calculated spectrum of **3D**. Traces A-C are reproduced from ref. 1 with permission from the American Chemical Society.

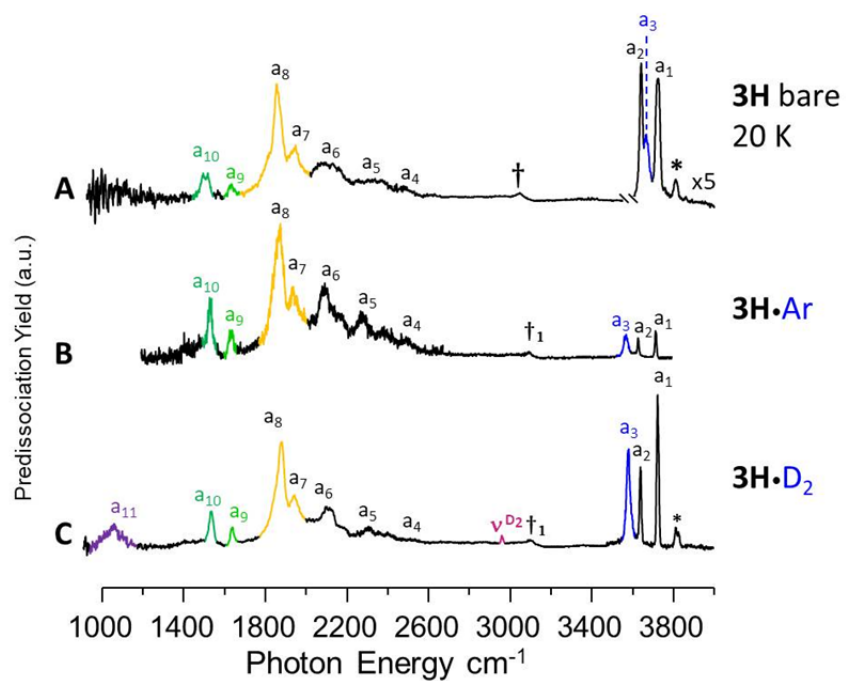

**Figure S2.** Comparison of the predissociation spectra of (A) **3H** bare with (B) **3H·Ar** and (C) **3H·D<sub>2</sub>** tags. Traces A and C are adapted from ref. 1 with permission from the American Chemical Society.

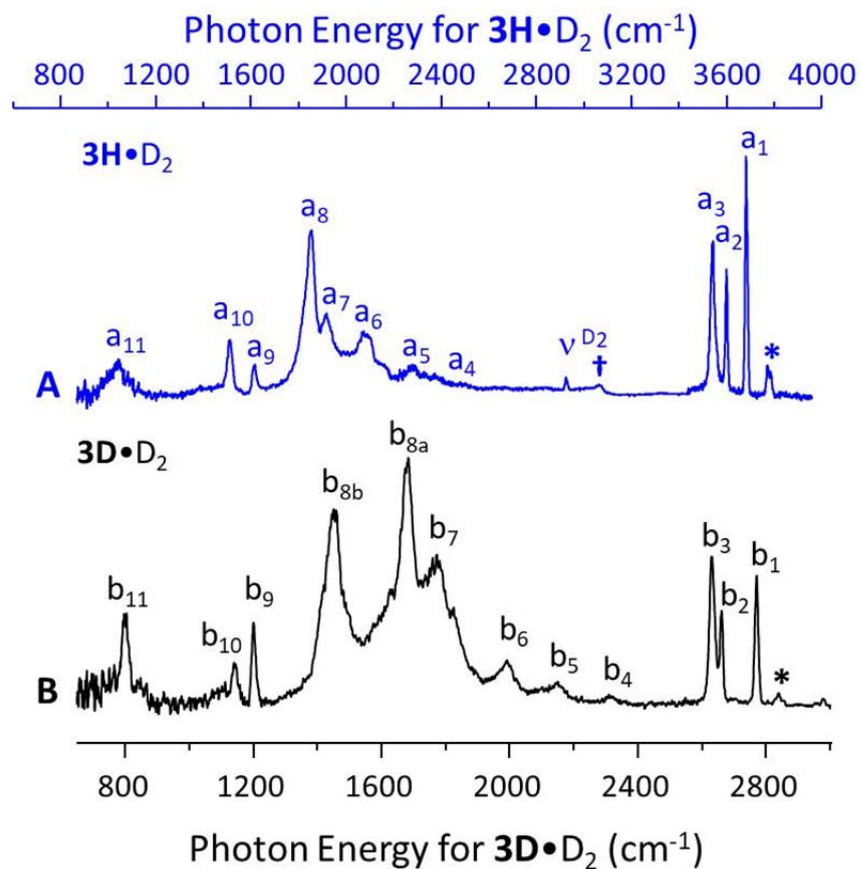

**Figure S3.** Vibrational predissociation spectrum of (A)  $3\text{H}\cdot\text{D}_2$  (blue trace/top scale) with the wavenumbers scaled by  $1/1.36$  compared with that of (B)  $3\text{D}\cdot\text{D}_2$  (black trace/bottom scale). Trace A and B were adapted from ref. 1 with permission from the American Chemical Society.

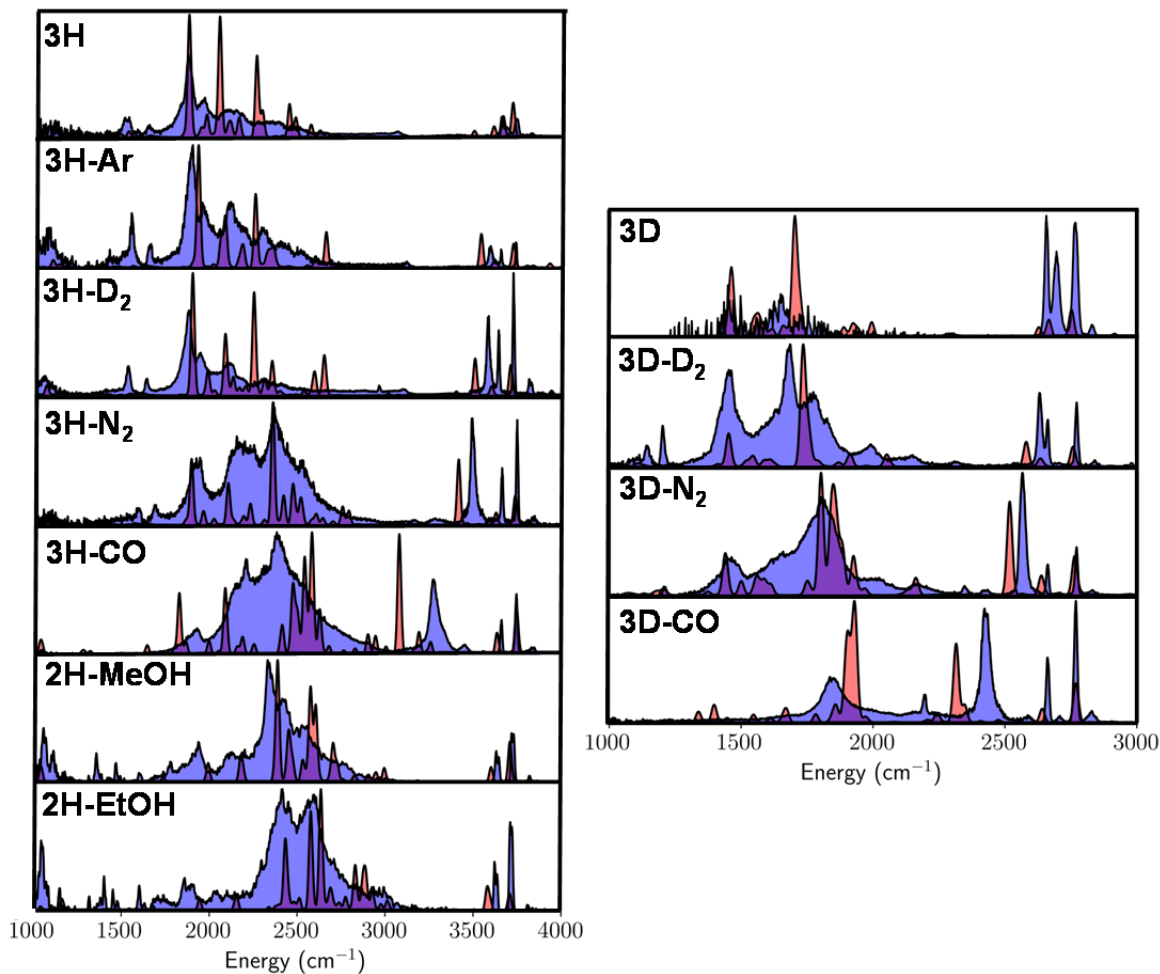

**Figure S4.** Comparison of experimental spectra for **3H**·X, **3D**·X, **2H**·MeOH·H<sub>2</sub>, and **2H**·EtOH·H<sub>2</sub> (blue) to the aug-cc-pVDZ anharmonic (VPT2) spectra (red) of **3H**·X, **3D**·X, **2H**·MeOH, and **2H**·EtOH, where X=Ar, D<sub>2</sub>, N<sub>2</sub>, CO. The baseline of the spectra has been shifted and both spectra have been scaled to have equal values for the largest signal. Regions where the two spectra overlap are shown in purple.

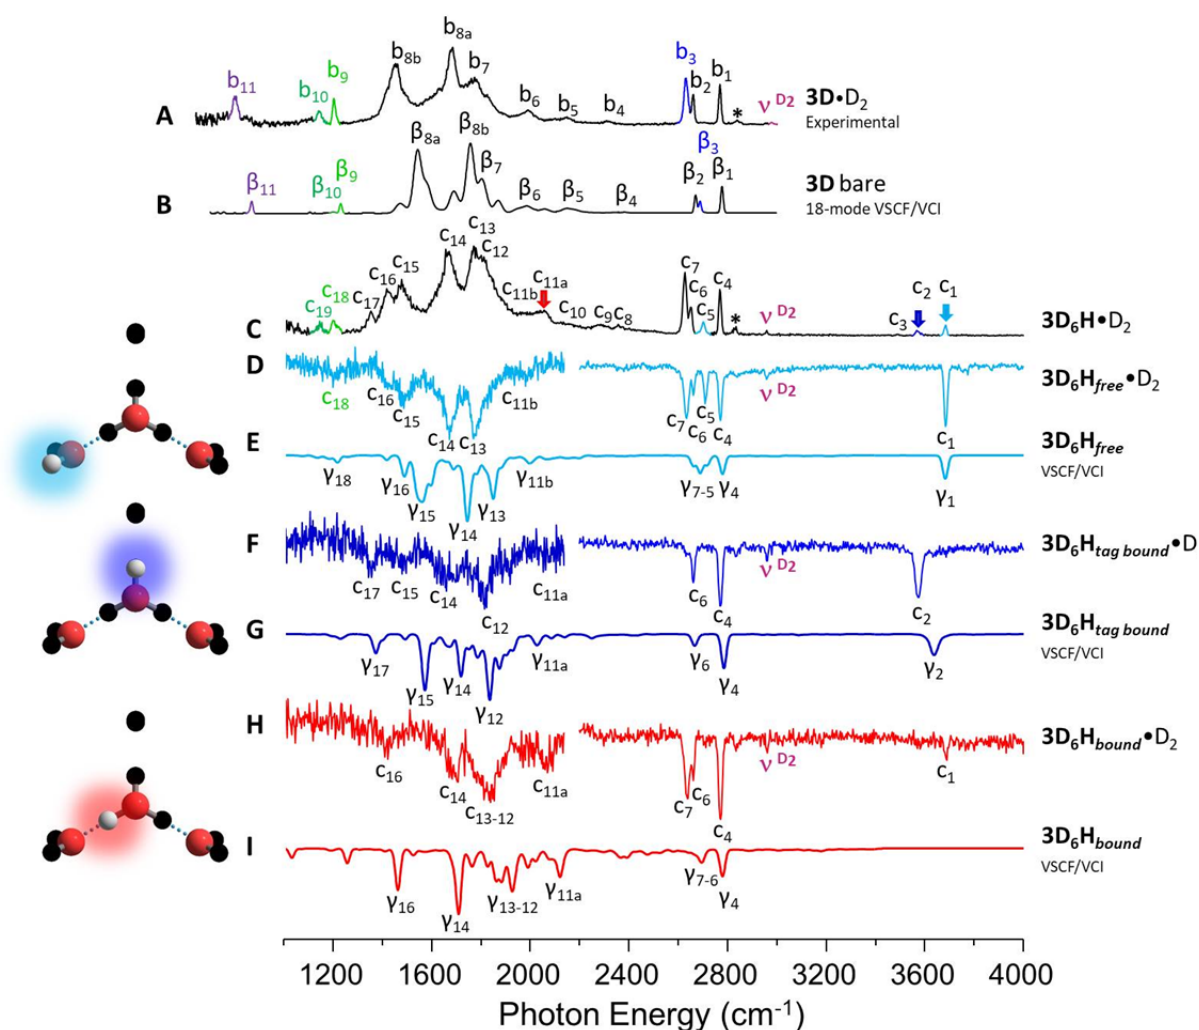

**Figure S5.** Comparison of the (A) predissociation spectrum of **3D** with  $D_2$  messenger tag, (B) **3D** bare 18-mode VSCF/VCI calculated spectrum, and (C) predissociation spectrum of  $HD_6O_3^+ \cdot D_2$ . The isotopomer-selective spectra of  $HD_6O_3^+ \cdot D_2$  (**3D<sub>6</sub>H**· $D_2$ ) is shown as depletion spectra (inverted traces) corresponding to the positions of the H atom at (D) the free OH of a flanking water (**3D<sub>6</sub>H<sub>free</sub>**), (F) the tag bound free OH of the hydronium core (**3D<sub>6</sub>H<sub>tag bound</sub>**), and (H) the shared proton position of the hydronium core and an exterior water (**3D<sub>6</sub>H<sub>bound</sub>**) with the corresponding VSCF/VCI calculations (E), (G), and (I) shown underneath each experimental trace, respectively. The colored arrows indicate the probe positions of the laser at 3685  $cm^{-1}$  (light blue), 3572  $cm^{-1}$  (dark blue), and 2049  $cm^{-1}$  (red). Trace (H) also includes spectral contributions from the **3D<sub>6</sub>H<sub>free</sub>** isotopologue because the probe position at 2049  $cm^{-1}$  overlaps with some spectral signature of the **3D<sub>6</sub>H<sub>free</sub>**, but dominantly has features of the **3D<sub>6</sub>H<sub>bound</sub>**. Traces A and B were adapted from ref. 1 with permission from the American Chemical Society.

**Table S1.** Cartesian coordinates for the optimized geometries for the complexes described in the text. All optimizations, unless otherwise specified, were performed at the MP2/aug-cc-pVDZ level of theory and basis, using very tight convergence. The Cartesian coordinates for **3H** at the CCSD(T)-F12a/VTZ level of theory is also included.

**3H (CCSD(T)-F12a/VTZ)**

|   |               |               |               |
|---|---------------|---------------|---------------|
| H | 1.7491200611  | -0.0796214950 | 0.0000000000  |
| H | 0.3439059486  | -0.2140113235 | 0.8689463747  |
| H | 0.3439059486  | -0.2140113235 | -0.8689463747 |
| O | 0.8513606628  | -0.4310220136 | 0.0000000000  |
| H | -0.5625577669 | 0.8116970646  | 2.5631675028  |
| H | -0.6119572769 | -0.7283452143 | 2.7127202516  |
| O | -0.4345874853 | -0.0158831079 | 2.0923462443  |
| H | -0.5625577669 | 0.8116970646  | -2.5631675028 |
| H | -0.6119572769 | -0.7283452143 | -2.7127202516 |
| O | -0.4345874853 | -0.0158831079 | -2.0923462443 |

**3H**

|   |               |               |               |
|---|---------------|---------------|---------------|
| O | 2.0806000347  | -0.4759731840 | -0.0042579152 |
| H | 2.5692803500  | -0.7766810743 | 0.7753016082  |
| H | 2.7184227788  | -0.4288690485 | -0.7315134676 |
| O | 0.0012598151  | 0.9136380260  | -0.0726813536 |
| H | 0.0035383837  | 1.6875908628  | 0.5133258638  |
| H | -0.8734694963 | 0.3624632875  | 0.0152096195  |
| H | 0.8730436807  | 0.3577309948  | 0.0146687762  |
| O | -2.0855372061 | -0.4646849837 | -0.0029676488 |
| H | -2.7235513586 | -0.4141174079 | -0.7298226373 |
| H | -2.5753499817 | -0.7627524727 | 0.7768951545  |

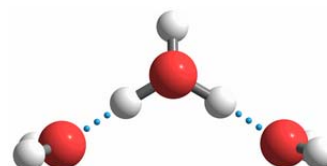

**3H·Ar**

|    |               |               |               |
|----|---------------|---------------|---------------|
| H  | -0.0011522191 | 0.0481666694  | -0.0016031659 |
| O  | 0.0059462683  | 0.1680587026  | 0.9587244008  |
| H  | 0.9291252741  | 0.0912087367  | 1.2406092373  |
| O  | -1.8483131098 | -0.2909242061 | 2.5865591428  |
| H  | -2.3114710328 | -1.1375646014 | 2.4560272246  |
| H  | -2.5077473667 | 0.4980716834  | 2.6902188718  |
| H  | -1.1142684601 | -0.1385740167 | 1.8751652647  |
| O  | -3.3427882241 | 1.6980122273  | 2.9174150595  |
| H  | -3.4428026597 | 2.0886416444  | 3.7977730929  |
| H  | -4.1357548998 | 1.9371563854  | 2.4167479936  |
| Ar | -3.3711011292 | -3.2614213155 | 2.3033640410  |

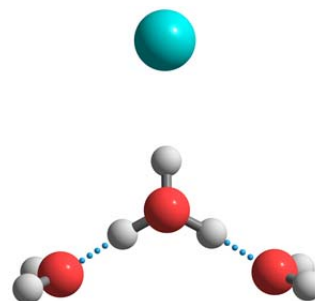



**3H·D<sub>2</sub>**

|          |              |              |              |
|----------|--------------|--------------|--------------|
| O        | 2.086861868  | -0.668632595 | 0.090966138  |
| H        | 2.575869197  | -0.760656052 | 0.920973567  |
| H        | 2.720293737  | -0.831173958 | -0.623053591 |
| O        | 0.000342903  | 0.661076141  | -0.346043561 |
| H        | 0.866342421  | 0.149429778  | -0.115542632 |
| H        | -0.866250222 | 0.149943122  | -0.116636848 |
| H        | 0.000387211  | 1.569720899  | 0.010020275  |
| O        | -2.087512118 | -0.667398387 | 0.088330913  |
| H        | -2.720131106 | -0.829574685 | -0.626492048 |
| H        | -2.577630788 | -0.759116690 | 0.917716407  |
| H(Iso=2) | 0.000365682  | 3.259927215  | 0.851992278  |
| H(Iso=2) | 0.000861206  | 3.447124212  | 0.117258103  |

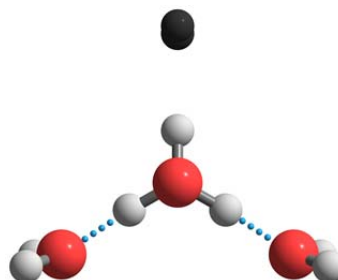**3H·N<sub>2</sub>**

|   |               |               |              |
|---|---------------|---------------|--------------|
| H | -0.0000480764 | 0.0005011582  | 0.0000258235 |
| O | -0.0002002547 | -0.0001242434 | 0.9675313421 |
| H | 0.9275096034  | -0.0000747760 | 1.2439569632 |
| O | -1.8063335934 | -0.7826024716 | 2.5439876673 |
| H | -2.1923994438 | -1.6597947607 | 2.3382282413 |
| H | -2.5258916662 | -0.0694087749 | 2.7141330988 |
| H | -1.0977155555 | -0.4969700664 | 1.8572322951 |
| O | -3.4738945869 | 1.0397845014  | 3.0516861088 |
| H | -3.5973001721 | 1.3545139885  | 3.9587544399 |
| H | -4.2745813128 | 1.2801522209  | 2.5646631974 |
| N | -2.8866324427 | -3.4480810859 | 2.0733214065 |
| N | -3.2698284991 | -4.5057506899 | 1.9623174161 |

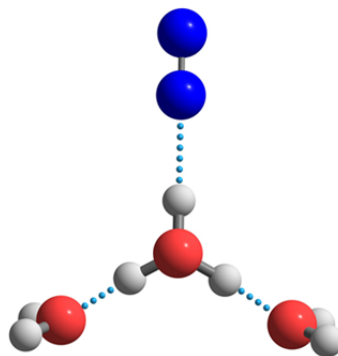**3H·CO**

|   |               |               |               |
|---|---------------|---------------|---------------|
| H | -3.4014017100 | -4.8679916000 | 1.8855265400  |
| O | -3.3777697000 | -3.9685986900 | 0.2944653010  |
| H | -3.9380549700 | -5.1526537000 | -0.9816949790 |
| O | -0.9875025650 | -0.0000021781 | -0.9147559880 |
| H | 0.8374438790  | -0.0000057008 | -0.5010151270 |
| H | -1.8797850200 | 1.6131760400  | -0.3370167820 |
| H | -1.8797914300 | -1.6131755500 | -0.3370150300 |
| O | -3.3777600500 | 3.9686050000  | 0.2944646910  |
| H | -3.9380495300 | 5.1526569000  | -0.9816983270 |
| H | -3.4013752100 | 4.8680111800  | 1.8855211400  |
| C | 4.4537154300  | -0.0000076074 | 0.0076883571  |
| O | 6.6028724900  | -0.0000006170 | 0.2409837990  |

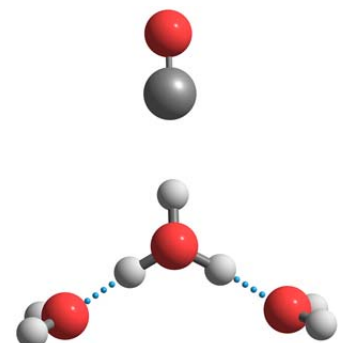

**2H·MeOH**

|   |               |               |               |
|---|---------------|---------------|---------------|
| H | 0.0000016132  | 0.0000021993  | -0.0000001821 |
| O | 0.0000000102  | 0.0000013246  | 0.9677192141  |
| H | 0.9299802072  | 0.0000001535  | 1.2372218405  |
| O | -1.7951230747 | 0.7877072412  | 2.5851129518  |
| C | -2.7492384077 | -0.3176112395 | 2.8305098039  |
| H | -2.2696797764 | 1.6680037931  | 2.3905468190  |
| H | -1.0979965991 | 0.5439776557  | 1.8832635992  |
| O | -3.0848406598 | 2.9593710050  | 2.3033064807  |
| H | -2.9265844943 | 3.6997014360  | 2.9069294642  |
| H | -3.4823950566 | 3.3407603190  | 1.5077101261  |
| H | -2.1443801268 | -1.1821491692 | 3.1190826961  |
| H | -3.3301444443 | -0.5129980650 | 1.9217070680  |
| H | -3.3867409850 | 0.0096790693  | 3.6569631881  |

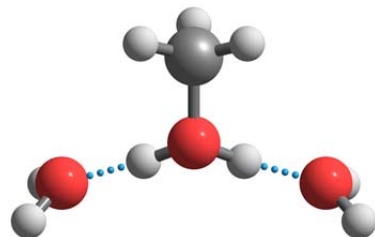**2H·EtOH**

|   |               |               |               |
|---|---------------|---------------|---------------|
| H | -2.0297270700 | 5.1915563800  | 1.4908967600  |
| O | -2.2263653400 | 3.9482204800  | 0.1637973160  |
| H | -2.9574309600 | 4.8448804600  | -1.2542580500 |
| O | 0.4224211180  | -0.0267913009 | -0.6499859230 |
| C | -0.7057868720 | -2.2427042000 | 0.7108756170  |
| H | 2.3059924700  | 0.1318098470  | -0.3166136890 |
| H | -0.5176359370 | 1.6049667300  | -0.2757993330 |
| O | 5.2044405600  | -0.0403410393 | 0.0095973699  |
| H | 6.3328555700  | -0.1097394480 | -1.4285829600 |
| H | 6.2003669800  | 0.5952501310  | 1.4050553000  |
| C | -3.3597287800 | -2.6475505200 | -0.2677941890 |
| H | -0.6360234730 | -1.8250137800 | 2.7429385000  |
| H | 0.5746834920  | -3.8069651800 | 0.2567458110  |
| H | -3.3488582500 | -3.0141215800 | -2.3112558200 |
| H | -4.5742028300 | -1.0137423900 | 0.1475463160  |
| H | -4.1608967900 | -4.3060579400 | 0.6975684900  |

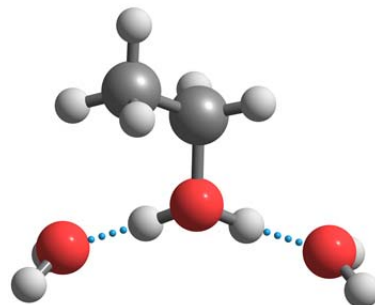

**Table S2.** Table of proton affinities gathered from NIST.<sup>2</sup>

| <b>Molecule or Atom</b> | <b>Proton Affinities (kJ/mol)</b> |
|-------------------------|-----------------------------------|
| He                      | 177.8                             |
| Ar                      | 369.2                             |
| H <sub>2</sub>          | 422.3                             |
| N <sub>2</sub>          | 493.8                             |
| CO                      | 594                               |
| H <sub>2</sub> O        | 691                               |

**Table S3.** Band labels, experimental frequencies and assignments for **3H**·X where X=Ar, D<sub>2</sub>, N<sub>2</sub>, CO, and H<sub>2</sub>O. Assignments from VSCF/VCI are based on ref. 1 with complicated mixed state bands involving the IHB simplified to “Mixed states involving the IHB”.

| Label<br>3H·Ar  | Exp. <sup>a</sup><br>3H·Ar | Label<br>3H·D <sub>2</sub>                   | Exp. <sup>a</sup><br>3H·D <sub>2</sub> | Label<br>3H·N <sub>2</sub>                   | Exp. <sup>a</sup><br>3H·N <sub>2</sub> | Label<br>3H·CO                     | Exp. <sup>a</sup><br>3H·CO | Label<br>4H·D <sub>2</sub> | Exp. <sup>a</sup><br>4H·D <sub>2</sub> | VSCF/VCI assignments for 3H <sup>b</sup> and 4H·D <sub>2</sub> <sup>c</sup>                            |
|-----------------|----------------------------|----------------------------------------------|----------------------------------------|----------------------------------------------|----------------------------------------|------------------------------------|----------------------------|----------------------------|----------------------------------------|--------------------------------------------------------------------------------------------------------|
| *               | -                          | *                                            | 3814,<br>3828                          | *                                            | 3827                                   | *                                  | 3814,<br>3830              | *                          | 3815,<br>3850                          | H <sub>2</sub> O antisym. stretch + H <sub>3</sub> O <sup>+</sup> torsion <sup>3</sup>                 |
| a <sub>1</sub>  | 3722                       | a <sub>1</sub>                               | 3726                                   | n <sub>1</sub>                               | 3725                                   | co <sub>1</sub>                    | 3728                       | a <sub>1</sub>             | 3733                                   | Free OH antisym. H <sub>2</sub> O stretch                                                              |
| a <sub>2</sub>  | 3635                       | a <sub>2</sub>                               | 3640                                   | n <sub>2</sub>                               | 3640                                   | co <sub>2</sub>                    | 3644                       | a <sub>2</sub>             | 3724                                   | Free OH antisym. AD H <sub>2</sub> O stretch                                                           |
| a <sub>3</sub>  | 3577                       | a <sub>3</sub>                               | 3580                                   | n <sub>3</sub>                               | 3468                                   | co <sub>3</sub>                    | 3259                       | a <sub>3</sub>             | 3648                                   | Free OH sym. H <sub>2</sub> O stretch                                                                  |
| t <sub>1</sub>  | 3100                       | t <sub>1</sub>                               | 3102                                   |                                              |                                        |                                    |                            | a <sub>4</sub>             | 3636                                   | Free OH sym. AD H <sub>2</sub> O stretch                                                               |
|                 |                            |                                              |                                        |                                              |                                        |                                    |                            |                            |                                        | Free OH H <sub>3</sub> O <sup>+</sup> stretch                                                          |
|                 |                            |                                              |                                        |                                              |                                        |                                    |                            |                            |                                        | Complicated comb. band + IHB antisym. stretch                                                          |
|                 |                            |                                              |                                        | ‡ <sub>1</sub>                               | 3261 <sup>d</sup>                      | ‡ <sub>1</sub>                     | 3433 <sup>d</sup>          |                            |                                        |                                                                                                        |
|                 |                            |                                              |                                        | ‡ <sub>2</sub>                               | 3145 <sup>d</sup>                      | ‡ <sub>2</sub>                     | 2879 <sup>d</sup>          |                            |                                        |                                                                                                        |
| a <sub>4</sub>  | 2501                       | a <sub>4</sub><br>v <sup>D<sub>2</sub></sup> | 2520<br>2961                           | n <sub>4</sub><br>v <sup>N<sub>2</sub></sup> | 2502<br>-                              | co <sub>4</sub><br>v <sup>CO</sup> | 2517<br>-                  | -                          | -                                      | Mixed states involving the IHB D <sub>2</sub> /N <sub>2</sub> /CO stretch <sup>e</sup>                 |
|                 |                            |                                              |                                        |                                              |                                        |                                    |                            | a <sub>5-7</sub>           | 2653                                   | Complex combination bands involving H <sub>3</sub> O <sup>+</sup> v <sub>as</sub> + rotation + bend    |
| a <sub>5</sub>  | 2283                       | a <sub>5</sub>                               | 2307                                   | n <sub>5</sub>                               | 2344                                   | co <sub>5</sub>                    | 2374                       |                            |                                        | Mixed states involving the IHB                                                                         |
|                 |                            |                                              |                                        |                                              |                                        |                                    |                            | a <sub>8</sub>             | 2300                                   | H <sub>3</sub> O <sup>+</sup> rotation + H <sub>2</sub> O bend                                         |
|                 |                            |                                              |                                        |                                              |                                        |                                    |                            | a <sub>9</sub>             | 2237                                   | H <sub>3</sub> O <sup>+</sup> rotation + bend                                                          |
| a <sub>6</sub>  | 2097                       | a <sub>6</sub>                               | 2109                                   | n <sub>6</sub>                               | 2173                                   | co <sub>6</sub>                    | 2191                       |                            |                                        | Mixed states involving the IHB                                                                         |
| a <sub>7</sub>  | 1945                       | a <sub>7</sub>                               | 1943                                   | n <sub>7</sub>                               | 1923                                   | co <sub>7</sub>                    | 1909                       |                            |                                        | Mixed states involving the IHB                                                                         |
| a <sub>8</sub>  | 1874                       | a <sub>8</sub>                               | 1878                                   | n <sub>8</sub>                               | 1896                                   |                                    |                            | a <sub>10</sub>            | 1904                                   | Mixed states involving the IHB                                                                         |
| a <sub>9</sub>  | 1640                       | a <sub>9</sub>                               | 1639                                   | n <sub>9</sub>                               | 1666                                   |                                    |                            |                            |                                        | H <sub>3</sub> O <sup>+</sup> bend                                                                     |
| a <sub>10</sub> | 1537                       | a <sub>10</sub>                              | 1534                                   | n <sub>10</sub>                              | 1573                                   |                                    |                            |                            |                                        | H <sub>2</sub> O bend + IHB antisym. stretch                                                           |
|                 |                            |                                              |                                        |                                              |                                        |                                    |                            | a <sub>11</sub>            | 1766                                   | H <sub>3</sub> O <sup>+</sup> umbrella + D <sub>3</sub> O <sup>+</sup> rotation about the A and B axes |
|                 |                            |                                              |                                        |                                              |                                        |                                    |                            | a <sub>12</sub>            | 1616                                   | H <sub>3</sub> O <sup>+</sup> and HOH bends                                                            |
| a <sub>11</sub> | 1060                       | a <sub>11</sub>                              | 1059                                   | n <sub>11</sub>                              | 1068                                   |                                    |                            |                            |                                        | H <sub>3</sub> O <sup>+</sup> umbrella                                                                 |
| ↓               | 2099                       | ↓                                            | 2100                                   | ↓                                            | 2250                                   | ↓                                  | 2344                       | ↓                          | 2649                                   | Calculated Centroid <sup>f</sup>                                                                       |

<sup>a</sup>Experimental frequencies are accurate within ±4 cm<sup>-1</sup>.

<sup>b</sup>Assignments are based on VSCF/VCI calculations reported in ref. 1 and details on the “Mixed states involving the IHB” can be found there.

<sup>c</sup>Assignments are based on VPT2 calculations reported in ref. 4.

<sup>d</sup>Unassigned features.

<sup>e</sup>Assigned based on proximity to D<sub>2</sub> stretch fundamental at 2993.6 cm<sup>-1</sup> and not VSCF/VCI calculations.<sup>5</sup>

<sup>f</sup>Centroid calculated as  $\sum_j \omega_j I_j / \sum_j I_j$ , the average intensity (I) weighted frequency (ω) within a select spectral region specified in the captions of Figure 3 and 4.

**Table S4.** Band labels and experimental frequencies for **2H**·MeOH·H<sub>2</sub> and **2H**·EtOH·H<sub>2</sub> with the VPT2 assignments of **2H**·MeOH and **2H**·EtOH.

| Label                          | Exp. <sup>a</sup>              | VPT2 <sup>b,c</sup>    | Label                          | Exp. <sup>a</sup>              | VPT2 <sup>b,c</sup>    | VPT2 Assignments <sup>c</sup>                                                                                                            |
|--------------------------------|--------------------------------|------------------------|--------------------------------|--------------------------------|------------------------|------------------------------------------------------------------------------------------------------------------------------------------|
| <b>2H</b> ·MeOH·H <sub>2</sub> | <b>2H</b> ·MeOH·H <sub>2</sub> | <b>2H</b> ·MeOH        | <b>2H</b> ·EtOH·H <sub>2</sub> | <b>2H</b> ·EtOH·H <sub>2</sub> | <b>2H</b> ·EtOH        |                                                                                                                                          |
| *                              | 3816                           | 3758-3823 <sup>c</sup> | *                              | 3811                           | 3760-3814 <sup>d</sup> | Outer H <sub>2</sub> O antisym. OH stretch + outer H <sub>2</sub> O rotation <sup>3</sup>                                                |
| Me <sub>1</sub>                | 3725                           | 3704                   | Et <sub>1</sub>                | 3721                           | 3709                   | Outer H <sub>2</sub> O antisym. OH stretch                                                                                               |
| Me <sub>2</sub>                | 3714                           | 3704                   | Et <sub>2</sub>                | 3712                           | 3698                   | Outer AD H <sub>2</sub> O antisym. OH stretch                                                                                            |
| Me <sub>3</sub>                | 3640                           | 3598                   | Et <sub>3</sub>                | 3637                           | 3601                   | Outer H <sub>2</sub> O sym. OH stretch                                                                                                   |
| Me <sub>4</sub>                | 3627                           | 3597                   | Et <sub>4</sub>                | 3622                           | 3592                   | Outer AD H <sub>2</sub> O sym. OH stretch                                                                                                |
| ‡ <sub>1</sub>                 | 3003                           | 2943, 2989             | ‡ <sub>1</sub>                 | 2968                           | 2834-2927 <sup>d</sup> | ROH <sub>2</sub> <sup>+</sup> HOH bend + ROH <sub>2</sub> <sup>+</sup> HOH rock                                                          |
| ‡ <sub>2</sub>                 | 2760                           | 2699-2724 <sup>d</sup> | ‡ <sub>2</sub>                 | -----                          |                        | ROH <sub>2</sub> <sup>+</sup> HOH bend + ROH <sub>2</sub> <sup>+</sup> umbrella or wag; ROH <sub>2</sub> <sup>+</sup> HOH rock overtone  |
| Me <sub>5</sub>                | 2535                           | 2571                   | Et <sub>5</sub>                | 2579                           | 2635                   | In-phase ROH <sub>2</sub> <sup>+</sup> IHB                                                                                               |
| Me <sub>6</sub>                | 2417                           | 2370-2531 <sup>d</sup> |                                |                                | 2449, 2513             | ROH <sub>2</sub> <sup>+</sup> IHB + low-frequency modes; ROH <sub>2</sub> <sup>+</sup> HOH rock + ROH <sub>2</sub> <sup>+</sup> umbrella |
| Me <sub>7</sub>                | 2340                           | 2385                   | Et <sub>6</sub>                | 2413                           | 2578                   | Out-of-phase ROH <sub>2</sub> <sup>+</sup> IHB                                                                                           |
| Me <sub>8</sub>                | 2197                           |                        |                                |                                | 2432, 2438             | ROH <sub>2</sub> <sup>+</sup> HOH bend + ROH <sub>2</sub> <sup>+</sup> HOH rotation                                                      |
| Me <sub>9</sub>                | 2115                           | 1733-2189 <sup>d</sup> | Et <sub>7</sub>                | 2040                           | 1944-2160 <sup>d</sup> | Overtones and combination bands involving ROH <sub>2</sub> <sup>+</sup> HOH rotations and umbrella                                       |
| Me <sub>10</sub>               | 1935                           |                        | Et <sub>8</sub>                | 1883                           | 1679                   |                                                                                                                                          |
| Me <sub>11</sub>               | 1771                           |                        | Et <sub>9</sub>                | 1709                           |                        |                                                                                                                                          |
| Me <sub>12</sub>               | 1599                           | 1556, 1579             | Et <sub>10</sub>               | 1603                           | 1549, 1584             | Outer H <sub>2</sub> O bend                                                                                                              |
| Me <sub>13</sub>               | 1465                           | 1449                   | Et <sub>11</sub>               | 1453                           | 1438, 1468             | CH <sub>3</sub> bends                                                                                                                    |
|                                |                                |                        | Et <sub>12</sub>               | 1403                           | 1363, 1396             | CH bends                                                                                                                                 |
| Me <sub>14</sub>               | 1353                           | 1357                   |                                |                                |                        | ROH <sub>2</sub> <sup>+</sup> HOH rock                                                                                                   |
|                                |                                |                        | Et <sub>13</sub>               | 1319                           | 1304                   | ROH <sub>2</sub> <sup>+</sup> HOH rock                                                                                                   |
| Me <sub>15</sub>               | 1105                           | 1140, 1152             | Et <sub>14</sub>               | 1149                           | 1161, 1165             | ROH <sub>2</sub> <sup>+</sup> umbrella or HOH rotation or CO stretch + low-frequency modes                                               |
| Me <sub>16</sub>               | 1055                           | 1038                   | Et <sub>15</sub>               | 1047                           | 1041                   | ROH <sub>2</sub> <sup>+</sup> umbrella                                                                                                   |
| ↓                              | 2312                           |                        | ↓                              | 2451                           |                        | Calculated Centroid <sup>e</sup>                                                                                                         |

<sup>a</sup>Experimental frequencies are accurate within  $\pm 4$  cm<sup>-1</sup>.<sup>b</sup>Based on VPT2 calculations evaluated at the MP2/aug-cc-pVDZ level of theory and basis. When a range is provided there are multiple transitions to states with similar character in this frequency range.<sup>c</sup>VPT2 frequencies are listed in increasing cm<sup>-1</sup>, and the listed assignments are based on this calculation. Where several calculated transitions lie close to a feature in the spectrum, the specific assignment is not conclusive.<sup>d</sup>Frequency ranges are reported for the VPT2 results when three or more transitions contribute intensity in the reported frequency range.<sup>e</sup>Centroid calculated as  $\sum_j \omega_j I_j / \sum_j I_j$ , the average intensity (I) weighted frequency ( $\omega$ ) within a select spectral region specified in the captions of Figure 3 and 4.

**Table S5.** Band labels, experimental frequencies and assignments for 3D·X where X=D<sub>2</sub>, N<sub>2</sub>, CO, and D<sub>2</sub>O. Assignments which were complex from ref. 1 and 4 were simplified with “Mixed states involving the IDB” or “Mixed states involving D<sub>3</sub>O<sup>+</sup>/DOD bends”.

| Label<br>3D·D <sub>2</sub>                  | Exp. <sup>a</sup><br>3D·D <sub>2</sub> | Exp. <sup>a</sup><br>3D·N <sub>2</sub> | Exp. <sup>a</sup><br>3D·CO | Label<br>4D·D <sub>2</sub> | Exp. <sup>a</sup><br>4D·D <sub>2</sub> | VSCF/VCI assignments for 3D <sup>b</sup> and 4D·D <sub>2</sub> <sup>c</sup>                        |
|---------------------------------------------|----------------------------------------|----------------------------------------|----------------------------|----------------------------|----------------------------------------|----------------------------------------------------------------------------------------------------|
| *                                           | 2840                                   | 2828                                   | 2827                       | *                          | 2822                                   | D <sub>2</sub> O antisym. stretch + D <sub>3</sub> O <sup>+</sup> torsion <sup>3</sup>             |
| b <sub>1</sub>                              | 2770                                   | 2767                                   | 2768                       | b <sub>1</sub>             | 2772                                   | Free OD antisym. D <sub>2</sub> O stretch                                                          |
|                                             |                                        |                                        |                            | b <sub>2</sub>             | 2765                                   | Free OD antisym. AD D <sub>2</sub> O stretch                                                       |
| b <sub>2</sub>                              | 2631                                   | 2658                                   | 2661                       | b <sub>3</sub>             | 2664                                   | Free OD sym. D <sub>2</sub> O stretch                                                              |
|                                             |                                        |                                        |                            | b <sub>4</sub>             | 2657                                   | Free OD sym. AD D <sub>2</sub> O stretch                                                           |
| b <sub>3</sub>                              | 2660                                   | 2564                                   | 2429                       |                            |                                        | Free OD D <sub>3</sub> O <sup>+</sup> stretch                                                      |
| b <sub>4</sub>                              | 2314                                   | 2424                                   | -                          |                            |                                        | Combination band of D <sub>3</sub> O <sup>+</sup> bend + D <sub>2</sub> O bend                     |
| v <sup>D<sub>2</sub>/N<sub>2</sub>/CO</sup> | 2978                                   | 2344                                   | 2195                       | v <sup>D<sub>2</sub></sup> | -                                      | D <sub>2</sub> /N <sub>2</sub> /CO stretch <sup>d</sup>                                            |
|                                             |                                        |                                        |                            | † <sub>1</sub>             | 2348                                   | Mixed states involving the IDB                                                                     |
| b <sub>5</sub>                              | 2149                                   | 2164                                   | -                          |                            |                                        | Mixed states involving the IDB                                                                     |
|                                             |                                        |                                        |                            | b <sub>5-6</sub>           | 2048                                   | Mixed states involving the IDB                                                                     |
| b <sub>6</sub>                              | 1991                                   | 2010                                   | -                          |                            |                                        | Low freq. modes + D <sub>3</sub> O <sup>+</sup> rotation + wag + umbrella                          |
| b <sub>7</sub>                              | 1770                                   | 1799                                   | 1847                       | b <sub>7</sub>             | 1999                                   | IDB OD stretch                                                                                     |
| b <sub>8a</sub>                             | 1680                                   | 1651                                   | 1688                       |                            |                                        | Mixed states involving the IDB                                                                     |
|                                             |                                        |                                        |                            | b <sub>8</sub>             | 1686                                   | Mixed states involving D <sub>3</sub> O <sup>+</sup> /DOD bends                                    |
| b <sub>8b</sub>                             | 1452                                   | 1459                                   |                            |                            |                                        | Mixed states involving the IDB                                                                     |
| b <sub>9</sub>                              | 1202                                   | 1206                                   |                            |                            |                                        | D <sub>3</sub> O <sup>+</sup> bend                                                                 |
|                                             |                                        |                                        |                            | b <sub>9</sub>             | 1639                                   | D <sub>3</sub> O <sup>+</sup> /DOD bends + frustrated rotation of D <sub>3</sub> O <sup>+</sup>    |
| b <sub>10</sub>                             | 1143                                   |                                        |                            |                            |                                        | D <sub>2</sub> O bend                                                                              |
|                                             |                                        |                                        |                            | b <sub>10</sub>            | 1402,                                  | D <sub>3</sub> O <sup>+</sup> umbrella + D <sub>3</sub> O <sup>+</sup> rotation about A and B axes |
|                                             |                                        |                                        |                            |                            | 1459                                   |                                                                                                    |
|                                             |                                        |                                        |                            | b <sub>11</sub>            | 1301                                   |                                                                                                    |
| b <sub>11</sub>                             | 800                                    |                                        |                            |                            |                                        | D <sub>3</sub> O <sup>+</sup> umbrella                                                             |
|                                             |                                        |                                        |                            | b <sub>12</sub>            | 1198                                   | D <sub>3</sub> O <sup>+</sup> and DOD bends                                                        |
| ↓                                           | 1664                                   | 1744                                   | 1866                       | ↓                          | 2024                                   | Calculated Centroid                                                                                |

<sup>a</sup>Experimental frequencies are accurate within ±4 cm<sup>-1</sup>.

<sup>b</sup>Assignments are based on VSCF/VCI calculations reported in ref. 1.

<sup>c</sup>Assignments are based on VPT2 calculations reported in ref. 4.

<sup>d</sup>Assigned based on proximity to D<sub>2</sub> stretch fundamental<sup>5</sup> at 2993.6 cm<sup>-1</sup>, the CO stretch frequency<sup>6</sup> at 2148 cm<sup>-1</sup> and the N<sub>2</sub> stretch frequency<sup>7</sup> at 2358.57 cm<sup>-1</sup> and not VSCF/VCI calculations.

**Table S6.** Frequencies (harmonic ( $\omega$ ), anharmonic ( $\nu$ ) and deperturbed anharmonic (depert) and intensities of intense features in the calculated spectra between 1000 and 3000  $\text{cm}^{-1}$  for **3H** and below 2200  $\text{cm}^{-1}$  for **3D** of the systems for which spectra are reported in Figures 3 and 4, evaluated at the MP2/aug-cc-pVDZ level of theory and basis as implemented in Gaussian 16 (G16.A03).<sup>8</sup> A complete list of the calculated frequencies and intensities is provided in an EXCEL workbook.

**3H**

| Vibration                                                           | $\omega$ (harm)<br>( $\text{cm}^{-1}$ ) | $\nu$ (anharm)<br>( $\text{cm}^{-1}$ ) | I (harm)<br>( $\text{km mol}^{-1}$ ) | I (anharm)<br>( $\text{km mol}^{-1}$ ) | Depert<br>( $\text{cm}^{-1}$ ) |
|---------------------------------------------------------------------|-----------------------------------------|----------------------------------------|--------------------------------------|----------------------------------------|--------------------------------|
| in-phase IHB                                                        | 2630.15                                 | 2279.18                                | 1146.44                              | 259.95                                 | 2174.26                        |
| out-of-phase IHB                                                    | 2496.62                                 | 1863.14                                | 3972.96                              | 1223.29                                | 2023.84                        |
| out-of-phase $\text{H}_2\text{O}$ bend/ $\text{H}_3\text{O}^+$ wag  | 1687.27                                 | 1628.38                                | 62.82                                | 5.75                                   | 1612.94                        |
| in-phase $\text{H}_2\text{O}$ bend/ $\text{H}_3\text{O}^+$ HOH bend | 1683.02                                 | 1545.60                                | 13.49                                | 3.48                                   | 1541.81                        |
| in-phase $\text{H}_2\text{O}$ bend/ $\text{H}_3\text{O}^+$ HOH bend | 1621.37                                 | 1606.66                                | 3.72                                 | 1.21                                   | 1541.81                        |
| out-of-phase $\text{H}_2\text{O}$ bend/ $\text{H}_3\text{O}^+$ wag  | 1591.08                                 | 1519.41                                | 1.98                                 | 59.93                                  | 1589.18                        |
| IHB out-of-plane bend ( $\text{H}_3\text{O}^+$ umbrella)            | 1248.56                                 | 1101.33                                | 213.57                               | 159.55                                 | 1099.46                        |
| $\text{H}_3\text{O}^+$ rotation about symmetry axis                 | 1072.70                                 | 1012.53                                | 71.67                                | 43.40                                  | 1009.77                        |
| overtone - out-of-plane bend                                        | 2497.12                                 | 2040.24                                |                                      | 164.33                                 | 2130.91                        |
| overtone - $\text{H}_3\text{O}^+$ rotation                          | 2145.40                                 | 1933.92                                |                                      | 86.83                                  | 1933.91*                       |
| combination – out-of-plane bend + $\text{H}_3\text{O}^+$ rotation   | 2321.26                                 | 2247.13                                |                                      | 819.66                                 | 2086.43                        |

**3H-Ar**

| Vibration                                                           | $\omega$ (harm)<br>( $\text{cm}^{-1}$ ) | $\nu$ (anharm)<br>( $\text{cm}^{-1}$ ) | I (harm)<br>( $\text{km mol}^{-1}$ ) | I (anharm)<br>( $\text{km mol}^{-1}$ ) | Depert<br>( $\text{cm}^{-1}$ ) |
|---------------------------------------------------------------------|-----------------------------------------|----------------------------------------|--------------------------------------|----------------------------------------|--------------------------------|
| in-phase IHB                                                        | 2685.99                                 | 2341.87                                | 1274.69                              | 268.02                                 | 2341.87                        |
| out-of-phase IHB                                                    | 2566.95                                 | 2239.52                                | 3713.51                              | 947.37                                 | 2239.52                        |
| out-of-phase $\text{H}_2\text{O}$ bend/ $\text{H}_3\text{O}^+$ wag  | 1688.46                                 | 1621.98                                | 65.19                                | 15.66                                  | 1621.98                        |
| in-phase $\text{H}_2\text{O}$ bend/ $\text{H}_3\text{O}^+$ HOH bend | 1685.20                                 | 1558.82                                | 10.39                                | 4.61                                   | 1558.82                        |
| in-phase $\text{H}_2\text{O}$ bend/ $\text{H}_3\text{O}^+$ HOH bend | 1622.86                                 | 1627.22                                | 2.41                                 | 1.54                                   | 1627.22                        |
| out-of-phase $\text{H}_2\text{O}$ bend/ $\text{H}_3\text{O}^+$ wag  | 1598.68                                 | 1542.39                                | 6.69                                 | 15.70                                  | 1542.39                        |
| IHB out-of-plane bend ( $\text{H}_3\text{O}^+$ umbrella)            | 1239.02                                 | 1089.27                                | 205.92                               | 101.51                                 | 1089.27                        |
| $\text{H}_3\text{O}^+$ rotation about symmetry axis                 | 1055.88                                 | 983.53                                 | 66.34                                | 31.53                                  | 983.53*                        |
| overtone - out-of-plane bend                                        | 2478.05                                 | 2043.37                                |                                      | 378.43                                 | 2043.38*                       |
| overtone - $\text{H}_3\text{O}^+$ rotation                          | 2111.76                                 | 1886.00                                |                                      | 72.31                                  | 1886.00*                       |
| combination – out-of-plane bend + $\text{H}_3\text{O}^+$ rotation   | 2294.90                                 | 1915.78                                |                                      | 1643.74                                | 1915.78*                       |

**3H·D<sub>2</sub>**

| <b>Vibration</b>                                                         | <b>ω (harm)<br/>(cm<sup>-1</sup>)</b> | <b>v (anharm)<br/>(cm<sup>-1</sup>)</b> | <b>I (harm)<br/>(km mol<sup>-1</sup>)</b> | <b>I (anharm)<br/>(km mol<sup>-1</sup>)</b> | <b>Depert<br/>(cm<sup>-1</sup>)</b> |
|--------------------------------------------------------------------------|---------------------------------------|-----------------------------------------|-------------------------------------------|---------------------------------------------|-------------------------------------|
| in-phase IHB                                                             | 2706.81                               | 2351.99                                 | 1218.09                                   | 368.72                                      | 2347.09                             |
| out-of-phase IHB                                                         | 2594.38                               | 2248.91                                 | 3698.90                                   | 1125.78                                     | 2257.11                             |
| out-of-phase H <sub>2</sub> O bend/H <sub>3</sub> O <sup>+</sup> wag     | 1689.57                               | 1633.80                                 | 57.82                                     | 3.07                                        | 1594.93                             |
| in-phase H <sub>2</sub> O bend/H <sub>3</sub> O <sup>+</sup> HOH bend    | 1684.97                               | 1527.51                                 | 10.77                                     | 1.82                                        | 1544.97                             |
| in-phase H <sub>2</sub> O bend/H <sub>3</sub> O <sup>+</sup> HOH bend    | 1624.14                               | 1621.34                                 | 1.60                                      | 1.23                                        | 1602.01                             |
| out-of-phase H <sub>2</sub> O bend/H <sub>3</sub> O <sup>+</sup> wag     | 1600.79                               | 1544.50                                 | 9.97                                      | 18.36                                       | 1531.46                             |
| IHB out-of-plane bend (H <sub>3</sub> O <sup>+</sup> umbrella)           | 1227.33                               | 1071.04                                 | 207.30                                    | 108.33                                      | 1060.90                             |
| H <sub>3</sub> O <sup>+</sup> rotation about symmetry axis               | 1053.17                               | 986.10                                  | 67.55                                     | 35.35                                       | 986.10*                             |
| overtone - out-of-plane bend                                             | 2454.66                               | 1986.64                                 |                                           | 253.49                                      | 1986.64*                            |
| overtone - H <sub>3</sub> O <sup>+</sup> rotation                        | 2106.34                               | 1893.85                                 |                                           | 65.67                                       | 1893.85*                            |
| combination – out-of-plane bend + H <sub>3</sub> O <sup>+</sup> rotation | 2280.50                               | 1900.73                                 |                                           | 1281.34                                     | 1900.73*                            |

**3H·N<sub>2</sub>**

| <b>Vibration</b>                                                         | <b>ω (harm)<br/>(cm<sup>-1</sup>)</b> | <b>v (anharm)<br/>(cm<sup>-1</sup>)</b> | <b>I (harm)<br/>(km mol<sup>-1</sup>)</b> | <b>I (anharm)<br/>(km mol<sup>-1</sup>)</b> | <b>Depert<br/>(cm<sup>-1</sup>)</b> |
|--------------------------------------------------------------------------|---------------------------------------|-----------------------------------------|-------------------------------------------|---------------------------------------------|-------------------------------------|
| in-phase IHB                                                             | 2773.53                               | 2450.59                                 | 1278.45                                   | 402.43                                      | 2452.57                             |
| out-of-phase IHB                                                         | 2675.38                               | 2337.27                                 | 3483.82                                   | 1338.65                                     | 2356.43                             |
| out-of-phase H <sub>2</sub> O bend/H <sub>3</sub> O <sup>+</sup> wag     | 1693.13                               | 1636.32                                 | 43.48                                     | 2.94                                        | 1592.38                             |
| in-phase H <sub>2</sub> O bend/H <sub>3</sub> O <sup>+</sup> HOH bend    | 1685.11                               | 1514.29                                 | 9.96                                      | 6.16                                        | 1529.12                             |
| in-phase H <sub>2</sub> O bend/H <sub>3</sub> O <sup>+</sup> HOH bend    | 1626.03                               | 1622.97                                 | 1.04                                      | 5.92                                        | 1605.61                             |
| out-of-phase H <sub>2</sub> O bend/H <sub>3</sub> O <sup>+</sup> wag     | 1607.99                               | 1579.51                                 | 22.63                                     | 1.69                                        | 1551.76                             |
| IHB out-of-plane bend (H <sub>3</sub> O <sup>+</sup> umbrella)           | 1214.97                               | 1067.33                                 | 215.55                                    | 76.55                                       | 1034.59                             |
| H <sub>3</sub> O <sup>+</sup> rotation about symmetry axis               | 1034.58                               | 961.02                                  | 68.93                                     | 35.85                                       | 958.33                              |
| overtone - out-of-plane bend                                             | 2429.94                               | 1942.46                                 |                                           | 146.75                                      | 1942.46*                            |
| overtone - H <sub>3</sub> O <sup>+</sup> rotation                        | 2069.15                               | 1844.03                                 |                                           | 53.97                                       | 1844.03*                            |
| combination – out-of-plane bend + H <sub>3</sub> O <sup>+</sup> rotation | 2249.54                               | 1874.68                                 |                                           | 714.48                                      | 1874.68*                            |



**3H·CO**

| Vibration                                                                | $\omega$ (harm)<br>(cm <sup>-1</sup> ) | $\nu$ (anharm)<br>(cm <sup>-1</sup> ) | I (harm)<br>(km mol <sup>-1</sup> ) | I (anharm)<br>(km mol <sup>-1</sup> ) | Depert<br>(cm <sup>-1</sup> ) |
|--------------------------------------------------------------------------|----------------------------------------|---------------------------------------|-------------------------------------|---------------------------------------|-------------------------------|
| in-phase IHB                                                             | 2845.07                                | 2610.27                               | 1326.36                             | 292.83                                | 2603.62                       |
| out-of-phase IHB                                                         | 2768.02                                | 2523.75                               | 3240.52                             | 633.90                                | 2520.76                       |
| out-of-phase H <sub>2</sub> O bend/H <sub>3</sub> O <sup>+</sup> wag     | 1695.21                                | 1680.63                               | 37.25                               | 9.21                                  | 1584.39                       |
| in-phase H <sub>2</sub> O bend/H <sub>3</sub> O <sup>+</sup> HOH bend    | 1683.18                                | 1497.29                               | 7.84                                | 6.29                                  | 1505.43                       |
| in-phase H <sub>2</sub> O bend/H <sub>3</sub> O <sup>+</sup> HOH bend    | 1628.52                                | 1630.70                               | 1.35                                | 42.44                                 | 1626.81                       |
| out-of-phase H <sub>2</sub> O bend/H <sub>3</sub> O <sup>+</sup> wag     | 1614.04                                | 1484.59                               | 32.89                               | 2.09                                  | 1563.86                       |
| IHB out-of-plane bend (H <sub>3</sub> O <sup>+</sup> umbrella)           | 1193.98                                | 963.53                                | 213.63                              | 97.61                                 | 987.15                        |
| H <sub>3</sub> O <sup>+</sup> rotation about symmetry axis               | 1015.84                                | 924.66                                | 65.80                               | 48.45                                 | 924.66*                       |
| overtone - out-of-plane bend                                             | 2387.96                                | 1849.66                               |                                     | 86.46                                 | 1849.66*                      |
| overtone - H <sub>3</sub> O <sup>+</sup> rotation                        | 2031.67                                | 1784.15                               |                                     | 42.30                                 | 1784.15*                      |
| combination – out-of-plane bend + H <sub>3</sub> O <sup>+</sup> rotation | 2209.82                                | 1812.14                               |                                     | 423.99                                | 1812.14*                      |

**2H·MeOH**

| Vibration                                                                         | $\omega$ (harm)<br>(cm <sup>-1</sup> ) | $\nu$ (anharm)<br>(cm <sup>-1</sup> ) | I (harm)<br>(km mol <sup>-1</sup> ) | I (anharm)<br>(km mol <sup>-1</sup> ) | Depert<br>(cm <sup>-1</sup> ) |
|-----------------------------------------------------------------------------------|----------------------------------------|---------------------------------------|-------------------------------------|---------------------------------------|-------------------------------|
| in-phase IHB                                                                      | 2890.92                                | 2571.23                               | 1193.45                             | 638.15                                | 2568.05                       |
| out-of-phase IHB                                                                  | 2842.33                                | 2384.57                               | 3087.18                             | 924.10                                | 2471.39                       |
| in-phase H <sub>2</sub> O bend/MeOH <sub>2</sub> <sup>+</sup> HOH bend            | 1709.56                                | 1648.17                               | 0.20                                | 0.33                                  | 1620.46                       |
| out-of-phase H <sub>2</sub> O bend                                                | 1634.68                                | 1578.98                               | 38.17                               | 13.37                                 | 1578.98*                      |
| in-phase H <sub>2</sub> O bend/MeOH <sub>2</sub> <sup>+</sup> HOH bend            | 1614.49                                | 1556.42                               | 55.02                               | 12.82                                 | 1580.93                       |
| IHB out-of-plane bend (1) (H <sub>3</sub> O <sup>+</sup> umbrella)                | 1222.95                                | 1183.57                               | 98.24                               | 3.18                                  | 1117.67                       |
| IHB out-of-plane bend (2) (H <sub>3</sub> O <sup>+</sup> umbrella)                | 1144.99                                | 1038.10                               | 58.25                               | 126.72                                | 1103.50                       |
| MeOH <sub>2</sub> <sup>+</sup> HOH rotation about symmetry axis                   | 982.65                                 | 898.29                                | 74.95                               | 45.33                                 | 898.29*                       |
| overtone - out-of-plane bend (1)                                                  | 2445.90                                | 2182.43                               |                                     | 45.83                                 | 2182.43*                      |
| overtone - out-of-plane bend (2)                                                  | 2289.97                                | 2202.83                               |                                     | 6.57                                  | 2199.60                       |
| overtone - MeOH <sub>2</sub> <sup>+</sup> HOH rotation                            | 1965.30                                | 1732.70                               |                                     | 34.21                                 | 1732.70*                      |
| combination - out-of-plane bend (1) + MeOH <sub>2</sub> <sup>+</sup> HOH rotation | 2205.60                                | 1989.35                               |                                     | 112.93                                | 1989.35*                      |
| combination - out-of-plane bend (2) + MeOH <sub>2</sub> <sup>+</sup> HOH rotation | 2127.64                                | 1989.00                               |                                     | 35.84                                 | 1989.00*                      |

**2H·EtOH**

| <b>Vibration</b>                                                                  | <b><math>\omega</math> (harm)<br/>(cm<sup>-1</sup>)</b> | <b><math>\nu</math> (anharm)<br/>(cm<sup>-1</sup>)</b> | <b>I (harm)<br/>(km mol<sup>-1</sup>)</b> | <b>I (anharm)<br/>(km mol<sup>-1</sup>)</b> | <b>Depert<br/>(cm<sup>-1</sup>)</b> |
|-----------------------------------------------------------------------------------|---------------------------------------------------------|--------------------------------------------------------|-------------------------------------------|---------------------------------------------|-------------------------------------|
| in-phase IHB                                                                      | 2936.81                                                 | 2635.01                                                | 1317.63                                   | 988.76                                      | 2635.01*                            |
| out-of-phase IHB                                                                  | 2907.56                                                 | 2577.69                                                | 2692.18                                   | 853.35                                      | 2578.71                             |
| in-phase H <sub>2</sub> O bend/EtOH <sub>2</sub> <sup>+</sup> HOH bend            | 1704.21                                                 | 1647.55                                                | 3.14                                      | 1.62                                        | 1614.73                             |
| out-of-phase H <sub>2</sub> O bend                                                | 1634.71                                                 | 1583.98                                                | 41.72                                     | 25.33                                       | 1583.82                             |
| in-phase H <sub>2</sub> O bend/EtOH <sub>2</sub> <sup>+</sup> HOH bend            | 1616.63                                                 | 1548.91                                                | 72.73                                     | 22.06                                       | 1579.48                             |
| IHB out-of-plane bend (1) (H <sub>3</sub> O <sup>+</sup> umbrella)                | 1208.14                                                 | 1145.52                                                | 106.45                                    | 1.65                                        | 1103.35                             |
| IHB out-of-plane bend (2) (H <sub>3</sub> O <sup>+</sup> umbrella)                | 1131.93                                                 | 1040.88                                                | 35.40                                     | 42.95                                       | 1084.69                             |
| EtOH <sub>2</sub> <sup>+</sup> HOH rotation about symmetry axis                   | 956.94                                                  | 869.10                                                 | 59.63                                     | 11.97                                       | 872.71                              |
| overtone - out-of-plane bend (1)                                                  | 2416.27                                                 | 2160.37                                                |                                           | 49.15                                       | 2160.37*                            |
| overtone - out-of-plane bend (2)                                                  | 2263.86                                                 | 2157.75                                                |                                           | 18.53                                       | 2157.75*                            |
| overtone - EtOH <sub>2</sub> <sup>+</sup> HOH rotation                            | 1913.87                                                 | 1679.20                                                |                                           | 37.73                                       | 1679.20*                            |
| combination - out-of-plane bend (1) + EtOH <sub>2</sub> <sup>+</sup> HOH rotation | 2165.07                                                 | 1946.32                                                |                                           | 78.84                                       | 1946.32*                            |
| combination - out-of-plane bend (2) + EtOH <sub>2</sub> <sup>+</sup> HOH rotation | 2088.87                                                 | 1944.48                                                |                                           | 25.73                                       | 1944.48*                            |

**3D**

| <b>Vibration</b>                                                         | <b><math>\omega</math> (harm)<br/>(cm<sup>-1</sup>)</b> | <b><math>\nu</math> (anharm)<br/>(cm<sup>-1</sup>)</b> | <b>I (harm)<br/>(km mol<sup>-1</sup>)</b> | <b>I (anharm)<br/>(km mol<sup>-1</sup>)</b> | <b>Depert<br/>(cm<sup>-1</sup>)</b> |
|--------------------------------------------------------------------------|---------------------------------------------------------|--------------------------------------------------------|-------------------------------------------|---------------------------------------------|-------------------------------------|
| in-phase IDB                                                             | 1894.29                                                 | 1717.34                                                | 560.13                                    | 236.00                                      | 1670.53                             |
| out-of-phase IDB                                                         | 1873.61                                                 | 1696.91                                                | 1950.06                                   | 799.42                                      | 1608.73                             |
| out-of-phase D <sub>2</sub> O bend/D <sub>3</sub> O <sup>+</sup> wag     | 1226.05                                                 | 1196.58                                                | 80.48                                     | 18.16                                       | 1192.59                             |
| in-phase D <sub>2</sub> O bend/D <sub>3</sub> O <sup>+</sup> DOD bend    | 1216.95                                                 | 1147.55                                                | 3.79                                      | 2.95                                        | 1146.01                             |
| in-phase D <sub>2</sub> O bend/D <sub>3</sub> O <sup>+</sup> DOD bend    | 1189.45                                                 | 1189.22                                                | 2.24                                      | 0.91                                        | 1174.47                             |
| out-of-phase D <sub>2</sub> O bend/D <sub>3</sub> O <sup>+</sup> wag     | 1152.66                                                 | 1120.36                                                | 1.09                                      | 24.05                                       | 1112.34                             |
| IDB out-of-plane bend (D <sub>3</sub> O <sup>+</sup> umbrella)           | 908.35                                                  | 824.04                                                 | 103.93                                    | 80.61                                       | 824.04*                             |
| D <sub>3</sub> O <sup>+</sup> rotation about symmetry axis               | 772.86                                                  | 735.60                                                 | 23.72                                     | 1.78                                        | 735.60*                             |
| overtone - out-of-plane bend                                             | 1816.70                                                 | 1558.40                                                | 118.55                                    | 164.33                                      | 1609.61                             |
| overtone - D <sub>3</sub> O <sup>+</sup> rotation                        | 1545.72                                                 | 1429.34                                                | 28.35                                     | 86.83                                       | 1429.34*                            |
| combination – out-of-plane bend + D <sub>3</sub> O <sup>+</sup> rotation | 1681.21                                                 | 1455.49                                                | 475.57                                    | 819.66                                      | 1543.67                             |

**3D·D<sub>2</sub>**

| <b>Vibration</b>                                                         | <b><math>\omega</math> (harm)<br/>(cm<sup>-1</sup>)</b> | <b><math>\nu</math> (anharm)<br/>(cm<sup>-1</sup>)</b> | <b>I (harm)<br/>(km mol<sup>-1</sup>)</b> | <b>I (anharm)<br/>(km mol<sup>-1</sup>)</b> | <b>Depert<br/>(cm<sup>-1</sup>)</b> |
|--------------------------------------------------------------------------|---------------------------------------------------------|--------------------------------------------------------|-------------------------------------------|---------------------------------------------|-------------------------------------|
| in-phase IDB                                                             | 1950.08                                                 | 1754.73                                                | 573.31                                    | 305.17                                      | 1731.92                             |
| out-of-phase IDB                                                         | 1941.58                                                 | 1733.01                                                | 1821.43                                   | 1014.00                                     | 1739.35                             |
| out-of-phase D <sub>2</sub> O bend/D <sub>3</sub> O <sup>+</sup> wag     | 1226.45                                                 | 1220.23                                                | 77.80                                     | 11.41                                       | 1183.43                             |
| in-phase D <sub>2</sub> O bend/D <sub>3</sub> O <sup>+</sup> DOD bend    | 1217.29                                                 | 1137.45                                                | 2.59                                      | 0.79                                        | 1143.58                             |
| in-phase D <sub>2</sub> O bend/D <sub>3</sub> O <sup>+</sup> DOD bend    | 1191.54                                                 | 1190.70                                                | 1.18                                      | 0.04                                        | 1175.19                             |
| out-of-phase D <sub>2</sub> O bend/D <sub>3</sub> O <sup>+</sup> wag     | 1161.97                                                 | 1118.47                                                | 0.02                                      | 12.66                                       | 1122.56                             |
| IDB out-of-plane bend (D <sub>3</sub> O <sup>+</sup> umbrella)           | 893.56                                                  | 796.18                                                 | 100.61                                    | 52.71                                       | 793.51                              |
| D <sub>3</sub> O <sup>+</sup> rotation about symmetry axis               | 758.68                                                  | 724.37                                                 | 22.93                                     | 13.26                                       | 724.37*                             |
| overtone - out-of-plane bend                                             | 1787.12                                                 | 1516.85                                                |                                           | 46.38                                       | 1545.51                             |
| overtone - D <sub>3</sub> O <sup>+</sup> rotation                        | 1517.36                                                 | 1410.16                                                |                                           | 21.04                                       | 1410.16*                            |
| combination – out-of-plane bend + D <sub>3</sub> O <sup>+</sup> rotation | 1652.24                                                 | 1451.06                                                |                                           | 294.04                                      | 1451.06*                            |

**3D-N<sub>2</sub>**

| <b>Vibration</b>                                                         | <b><math>\omega</math> (harm)<br/>(cm<sup>-1</sup>)</b> | <b><math>\nu</math> (anharm)<br/>(cm<sup>-1</sup>)</b> | <b><math>I</math> (harm)<br/>(km mol<sup>-1</sup>)</b> | <b><math>I</math> (anharm)<br/>(km mol<sup>-1</sup>)</b> | <b>Depert<br/>(cm<sup>-1</sup>)</b> |
|--------------------------------------------------------------------------|---------------------------------------------------------|--------------------------------------------------------|--------------------------------------------------------|----------------------------------------------------------|-------------------------------------|
| in-phase IDB                                                             | 1998.48                                                 | 1838.94                                                | 584.58                                                 | 293.82                                                   | 1842.89                             |
| out-of-phase IDB                                                         | 1997.50                                                 | 1799.75                                                | 1722.53                                                | 564.99                                                   | 1799.75*                            |
| out-of-phase D <sub>2</sub> O bend/D <sub>3</sub> O <sup>+</sup> wag     | 1227.35                                                 | 1202.35                                                | 68.48                                                  | 24.78                                                    | 1182.49                             |
| in-phase D <sub>2</sub> O bend/D <sub>3</sub> O <sup>+</sup> DOD bend    | 1216.53                                                 | 1124.39                                                | 2.17                                                   | 0.23                                                     | 1136.37                             |
| in-phase D <sub>2</sub> O bend/D <sub>3</sub> O <sup>+</sup> DOD bend    | 1193.14                                                 | 1201.60                                                | 1.66                                                   | 1.51                                                     | 1184.56                             |
| out-of-phase D <sub>2</sub> O bend/D <sub>3</sub> O <sup>+</sup> wag     | 1169.74                                                 | 1161.42                                                | 2.22                                                   | 3.83                                                     | 1136.93                             |
| IDB out-of-plane bend (D <sub>3</sub> O <sup>+</sup> umbrella)           | 885.59                                                  | 811.55                                                 | 104.69                                                 | 24.29                                                    | 785.50                              |
| D <sub>3</sub> O <sup>+</sup> rotation about symmetry axis               | 745.20                                                  | 703.65                                                 | 24.27                                                  | 15.89                                                    | 703.25                              |
| overtone - out-of-plane bend                                             | 1771.19                                                 | 1497.53                                                | 63.88                                                  | 146.75                                                   | 1497.53*                            |
| overtone - D <sub>3</sub> O <sup>+</sup> rotation                        | 1490.39                                                 | 1370.78                                                | 16.84                                                  | 53.97                                                    | 1370.78*                            |
| combination – out-of-plane bend + D <sub>3</sub> O <sup>+</sup> rotation | 1630.79                                                 | 1436.97                                                | 189.19                                                 | 714.48                                                   | 1436.97*                            |

**3D-CO**

| <b>Vibration</b>                                                         | <b><math>\omega</math> (harm)<br/>(cm<sup>-1</sup>)</b> | <b><math>\nu</math> (anharm)<br/>(cm<sup>-1</sup>)</b> | <b><math>I</math> (harm)<br/>(km mol<sup>-1</sup>)</b> | <b><math>I</math> (anharm)<br/>(km mol<sup>-1</sup>)</b> | <b>Depert<br/>(cm<sup>-1</sup>)</b> |
|--------------------------------------------------------------------------|---------------------------------------------------------|--------------------------------------------------------|--------------------------------------------------------|----------------------------------------------------------|-------------------------------------|
| in-phase IDB                                                             | 2062.03                                                 | 1932.78                                                | 1605.62                                                | 327.96                                                   | 1171.88                             |
| out-of-phase IDB                                                         | 2049.99                                                 | 1926.67                                                | 551.05                                                 | 284.64                                                   | 1926.67*                            |
| out-of-phase D <sub>2</sub> O bend/D <sub>3</sub> O <sup>+</sup> wag     | 1227.70                                                 | 1237.90                                                | 63.24                                                  | 8.17                                                     | 1171.88                             |
| in-phase D <sub>2</sub> O bend/D <sub>3</sub> O <sup>+</sup> DOD bend    | 1214.05                                                 | 1097.12                                                | 1.70                                                   | 0.51                                                     | 1111.61                             |
| in-phase D <sub>2</sub> O bend/D <sub>3</sub> O <sup>+</sup> DOD bend    | 1195.12                                                 | 1221.83                                                | 2.77                                                   | 18.43                                                    | 1206.95                             |
| out-of-phase D <sub>2</sub> O bend/D <sub>3</sub> O <sup>+</sup> wag     | 1176.46                                                 | 1074.05                                                | 5.50                                                   | 5.39                                                     | 1156.57                             |
| IDB out-of-plane bend (D <sub>3</sub> O <sup>+</sup> umbrella)           | 871.26                                                  | 739.53                                                 | 103.51                                                 | 49.63                                                    | 759.46                              |
| D <sub>3</sub> O <sup>+</sup> rotation about symmetry axis               | 731.49                                                  | 683.92                                                 | 23.89                                                  | 18.79                                                    | 683.92*                             |
| overtone - out-of-plane bend                                             | 1742.53                                                 | 1447.01                                                |                                                        | 35.13                                                    | 1447.01*                            |
| overtone - D <sub>3</sub> O <sup>+</sup> rotation                        | 1462.97                                                 | 1335.63                                                |                                                        | 13.01                                                    | 1335.63*                            |
| combination – out-of-plane bend + D <sub>3</sub> O <sup>+</sup> rotation | 1602.75                                                 | 1397.83                                                |                                                        | 123.76                                                   | 1397.83*                            |

\*Denotes situations where due to the absence of nearly degenerate states, no deperturbation analysis was performed. As a result, the deperturbed frequencies are the same as the anharmonic frequencies.

**Table S7.** Band labels, experimental frequencies, and assignments for  $3\text{D}_6\text{H}\cdot\text{D}_2$  and its three isotopologues with the proton in the free OH of the flanking waters ( $3\text{D}_6\text{H}_{\text{free}}$ ), free OH of the hydronium core bound to a tag ( $3\text{D}_6\text{H}_{\text{tag bound}}$ ), and in the shared proton of the hydronium core bound to a flanking water ( $3\text{D}_6\text{H}_{\text{bound}}$ ), relevant to Fig. 5 and Fig. S4.

| Label                      | Label                                              | <sup>a</sup> Exp.                    | <sup>a</sup> Exp.                                  | VSCF/VCI                            | <sup>a</sup> Exp.                                                         | VSCF/VCI                                                   | <sup>a</sup> Exp.                                   | VSCF/VCI                             | Assignments based on VSCF/VCI calculations                                          |
|----------------------------|----------------------------------------------------|--------------------------------------|----------------------------------------------------|-------------------------------------|---------------------------------------------------------------------------|------------------------------------------------------------|-----------------------------------------------------|--------------------------------------|-------------------------------------------------------------------------------------|
| $3\text{D}\cdot\text{D}_2$ | $3\text{D}_6\text{H}\cdot\text{D}_2$<br>(VSCF/VCI) | $3\text{D}_6\text{H}\cdot\text{D}_2$ | $3\text{D}_6\text{H}_{\text{free}}\cdot\text{D}_2$ | $3\text{D}_6\text{H}_{\text{free}}$ | $3\text{D}_6\text{H}_{\text{tb}}\cdot\text{D}_2$<br><i>tb = tag bound</i> | $3\text{D}_6\text{H}_{\text{tb}}$<br><i>tb = tag bound</i> | $3\text{D}_6\text{H}_{\text{bound}}\cdot\text{D}_2$ | $3\text{D}_6\text{H}_{\text{bound}}$ |                                                                                     |
| $\nu^{\text{D}_2}$         | $c_1 (\gamma_1)$                                   | 3685                                 | 3685                                               | 3681                                |                                                                           |                                                            | 3685                                                | -                                    | Free OH HDO stretch                                                                 |
|                            | $c_2 (\gamma_2)$                                   | 3575                                 |                                                    |                                     | 3575                                                                      | 3630                                                       |                                                     |                                      | Free OH $\text{HD}_2\text{O}^+$ stretch                                             |
|                            | $c_3 (\gamma_3)$                                   | 3491 <sup>b</sup>                    |                                                    |                                     |                                                                           |                                                            |                                                     |                                      |                                                                                     |
|                            |                                                    | 2960                                 |                                                    |                                     |                                                                           |                                                            |                                                     |                                      | $\text{D}_2$ stretch <sup>c</sup>                                                   |
| *                          | *                                                  | 2831                                 | 2831                                               |                                     | 2831                                                                      |                                                            |                                                     |                                      | $\text{D}_2\text{O}$ antisym. stretch + $\text{D}_3\text{O}^+$ torsion <sup>3</sup> |
| $b_1$                      | $c_4 (\gamma_4)$                                   | 2771                                 | 2771                                               | 2778                                | 2771                                                                      | 2783                                                       | 2771                                                | 2779                                 | Free OD antisym. $\text{D}_2\text{O}$ stretch                                       |
|                            | $c_5 (\gamma_5)$                                   | 2704                                 | 2704                                               | 2715                                |                                                                           |                                                            |                                                     |                                      | Free OD HDO stretch                                                                 |
| $b_2$                      | $c_6 (\gamma_6)$                                   | 2653                                 | 2653                                               | 2659                                | 2653                                                                      | 2662                                                       | 2653                                                | 2663                                 | Free OD sym. $\text{D}_2\text{O}$ stretch                                           |
| $b_3$                      | $c_7 (\gamma_7)$                                   | 2629                                 | 2629                                               | 2688                                |                                                                           |                                                            | 2629                                                | 2693                                 | Free OD $\text{D}_3\text{O}^+/\text{HD}_2\text{O}^+$ stretch                        |
| $b_4$                      | $c_8 (\gamma_8)$                                   | 2356                                 |                                                    |                                     |                                                                           |                                                            |                                                     |                                      | Combination band of $\text{D}_3\text{O}^+$ bend + water bend                        |
|                            | $c_9 (\gamma_9)$                                   | 2284 <sup>b</sup>                    |                                                    |                                     |                                                                           |                                                            |                                                     |                                      |                                                                                     |
| $b_5$                      | $c_{10} (\gamma_{10})$                             | 2164                                 |                                                    |                                     |                                                                           |                                                            |                                                     |                                      | Mixed states involving the IDB                                                      |
| $b_6$                      | $c_{11a} (\gamma_{11a})$                           | 2059                                 |                                                    |                                     | 2059                                                                      | 2084                                                       | 2059                                                | 2120                                 | Mixed states involving the IHB                                                      |
|                            | $c_{11b} (\gamma_{11b})$                           | 1978                                 | 1978                                               | 1996                                |                                                                           |                                                            |                                                     |                                      | Mixed states involving the IDB                                                      |
| $b_7$                      | $c_{12} (\gamma_{12})$                             | 1807                                 |                                                    |                                     | 1807                                                                      | 1836                                                       | 1830                                                | 1919                                 | Mixed states involving the IHB + IDB                                                |
| $b_{8a}$                   | $c_{13} (\gamma_{13})$                             | 1774                                 | 1774                                               | 1851                                |                                                                           |                                                            | 1793                                                | 1880                                 | Mixed states involving the IHB + IDB                                                |
| $b_{8b}$                   | $c_{14} (\gamma_{14})$                             | 1672                                 | 1672                                               | 1740                                | 1672                                                                      | 1715                                                       | 1687                                                | 1706                                 | Mixed states involving the IDB                                                      |
|                            | $c_{15} (\gamma_{15})$                             | 1477                                 | 1477                                               | 1533                                | 1477                                                                      | 1573                                                       |                                                     |                                      | Mixed states involving the IDB                                                      |
|                            | $c_{16} (\gamma_{16})$                             | 1423                                 | 1423                                               | 1482                                |                                                                           |                                                            | 1423                                                | 1460                                 | Mixed states involving the IDB                                                      |
|                            | $c_{17} (\gamma_{17})$                             | 1354                                 |                                                    |                                     | 1354                                                                      | 1371                                                       |                                                     |                                      | Mixed states involving the IDB                                                      |
| $b_9$                      | $c_{18} (\gamma_{18})$                             | 1207                                 | 1207                                               | 1215                                |                                                                           |                                                            |                                                     |                                      | $\text{D}_3\text{O}^+$ bend                                                         |
| $b_{10}$                   | $c_{19} (\gamma_{19})$                             | 1144                                 |                                                    |                                     |                                                                           |                                                            |                                                     |                                      | $\text{D}_2\text{O}$ bend                                                           |

<sup>a</sup>Experimental frequencies are accurate within  $\pm 4 \text{ cm}^{-1}$ .

<sup>b</sup>Unassigned features.

<sup>c</sup>Assigned based on proximity to  $\text{D}_2$  stretch fundamental at  $2993.6 \text{ cm}^{-1}$  and not VSCF/VCI calculations.<sup>5</sup>

**Table S8.** The matrix elements ( $\text{cm}^{-1}$ ) for the F-G analysis of the coupling between the out-of-phase shared proton stretch and the two bending modes determined based on a transition state structure in which the hydronium core and the three oxygen atoms lie in a plane, while the water molecules lie in planes that are perpendicular to the plane containing the oxygen atoms. The  $\text{H}_2$  molecule also lies perpendicular to the plane of the oxygen atoms, while CO and  $\text{N}_2$  are collinear to the free OH bond in the **3H** core. The analysis is performed using both the local harmonic OH stretch frequency (harm IHB) and an approximation to the anharmonic local frequency (anharm IHB), obtained by scaling the frequency by the ratio of the VPT2 to the harmonic frequency of this vibration obtained at the same level of theory. In both cases, the bend frequency is harmonic. In this analysis, the two bends are decoupled from each other and each bend is allowed to couple to the IHB OH stretch at the harmonic level through both potential (F) and kinetic (G) coupling terms. The first row indicates values for **3H**, while the rows associated with the tags (X= $\text{H}_2$ ,  $\text{N}_2$ , CO) indicate changes from those bare values. Bend 1 and bend 2 have mixed character comprised of the exterior  $\text{H}_2\text{O}$  bend and  $\text{H}_3\text{O}^+$  wag in the **3H** system and the blue shifts seen in the Bend 1 and Bend 2 columns for diagonal elements reflects an increase in frequency of the free OH wagging vibration in  $\text{H}_3\text{O}^+$  with increased tag strength.

**The Matrix Elements ( $\text{cm}^{-1}$ ) for the F-G Analysis**

| System                   | Bend 1<br>( $\text{cm}^{-1}$ ) | Bend 2<br>( $\text{cm}^{-1}$ ) | Harm IHB<br>( $\text{cm}^{-1}$ ) | Anharm IHB<br>( $\text{cm}^{-1}$ ) | IHB-bend 1 (F)<br>( $\text{cm}^{-1}$ ) | IHB-bend 1 (G)<br>( $\text{cm}^{-1}$ ) | IHB-bend 2 (F)<br>( $\text{cm}^{-1}$ ) | IHB-bend 2 (G)<br>( $\text{cm}^{-1}$ ) |
|--------------------------|--------------------------------|--------------------------------|----------------------------------|------------------------------------|----------------------------------------|----------------------------------------|----------------------------------------|----------------------------------------|
| Diagonal Elements        |                                |                                |                                  |                                    | Off Diagonal Elements                  |                                        |                                        |                                        |
| <b>3H</b>                | 1652.32                        | 1614.21                        | 2451.24                          | 1855.28                            | -135.57                                | 86.67                                  | 329.87                                 | 133.57                                 |
| Shifts from <b>3H</b>    |                                |                                |                                  |                                    | Shifts from <b>3H</b>                  |                                        |                                        |                                        |
| <b>3H</b> · $\text{H}_2$ | 10.31                          | 11.00                          | 113.19                           | 363.11                             | -90.26                                 | 40.83                                  | -3.99                                  | -23.59                                 |
| <b>3H</b> · $\text{N}_2$ | 17.50                          | 14.9                           | 202.79                           | 463.61                             | -127.99                                | 59.57                                  | -20.89                                 | -38.57                                 |
| <b>3H</b> ·CO            | 26.29                          | 17.19                          | 301.71                           | 654.29                             | -118.89                                | 76.02                                  | -44.13                                 | -52.82                                 |

**Table S9.** Frequencies obtained by performing a F-G analysis using the matrix elements provided in Table S8. The first three columns are the frequencies obtained when the shared proton stretch is treated as a harmonic oscillator, and the second set of frequencies use the anharmonic frequency for the shared proton stretch. The first row indicates values for **3H**, while the rows associated with the tags (X=H<sub>2</sub>, N<sub>2</sub>, CO) indicate changes from those bare values. Bend 1 and bend 2 have mixed character comprised of the exterior H<sub>2</sub>O bend and H<sub>3</sub>O<sup>+</sup> wag in the **3H**.

**Fundamental Frequencies Obtained by Performing an F-G Analysis Using the Matrix Elements Provided in Table S8**

| System                  | Harmonic IHB                  |                               |                            | Anharmonic IHB                |                               |                            |
|-------------------------|-------------------------------|-------------------------------|----------------------------|-------------------------------|-------------------------------|----------------------------|
|                         | Bend 1<br>(cm <sup>-1</sup> ) | Bend 2<br>(cm <sup>-1</sup> ) | IHB<br>(cm <sup>-1</sup> ) | Bend 1<br>(cm <sup>-1</sup> ) | Bend 2<br>(cm <sup>-1</sup> ) | IHB<br>(cm <sup>-1</sup> ) |
| <b>3H</b>               | 1550.75                       | 1649.46                       | 2506.70                    | 1467.91                       | 1649.03                       | 1992.10                    |
| Shifts from <b>3H</b>   |                               |                               |                            |                               |                               |                            |
| <b>3H·H<sub>2</sub></b> | 22.84                         | 10.19                         | 103.18                     | 81.40                         | 10.17                         | 295.63                     |
| <b>3H·N<sub>2</sub></b> | 35.21                         | 15.98                         | 186.32                     | 100.11                        | 15.64                         | 383.78                     |
| <b>3H·CO</b>            | 46.87                         | 22.95                         | 279.01                     | 120.98                        | 22.53                         | 559.36                     |

The comparison of the results in Tables S8 and S9 show that the fundamentals of the higher frequency bend normal mode (bend 2) follow the same pattern was seen for the uncoupled bends (see Table S8). The frequency of the bend 1 normal mode shows greater tag dependence, and this is more pronounced when anharmonic frequencies are used for the IHB. This serves to illustrate the fact that with the blue-shift of the shared proton stretch, the mixing with the bends decreases, accounting for the observed blue shifts of this band with increasing interaction with the tag. A second, contributor to the shifts is seen in an underlying blue-shift of the bend frequencies (see the bend 1 and bend 2 columns in Table S8) with increased tag strength. Depending on the frequency of the IHB, this factor is typically smaller than the shift that comes from the reduction in mixing of these vibrations in the construction of the normal modes.

## Methods 1: VPT2 approaches and discussion of findings

As we consider the frequencies that are obtained from the VPT2 calculations, it is useful to start by remembering that such calculations have their limitations with respect to assignments when considering strongly coupled and anharmonic ions, like **3H** or **3D**. In the present study a degenerate form of VPT2 is employed. For these calculations, the Hamiltonian is partitioned into those terms that couple nearly degenerate states,  $H_{\text{deg}}$ , and those that do not,  $H_{\text{non-deg}}$ , and the Hamiltonian is replaced by  $H_{\text{non-deg}}$  for the purposes of calculating the second-order corrected, deperturbed energies. These deperturbed energies then become the diagonal elements for a reduced Hamiltonian that only includes the nearly degenerate states and the couplings between them. As noted in the text and in the results in Table S6, there are several excited states, which have excitation in vibrations that correspond to hindered rotations or the umbrella motion of the hydronium core, that are close in energy to the first excited state of the H-bonded OH stretch. While the results of VPT2 calculations performed using G16, reported in Table S6, indicate an assignment of a transition to excitations in one or two of the normal modes, in fact these excited states are linear combinations of several zero-order vibrationally excited levels, and the assignments reported in that table represent the leading contribution, which in some cases is lower than 50%. On the other hand, we can use the energies calculated using VPT2 to explore trends in the frequencies of specific vibrationally excited states of **3H** or **3D** upon the introduction of a tag molecule or through substitution of the free OH with a methyl or ethyl group. We also find (see Figure S5) that the spectra calculated using VPT2 provide a good qualitative description of the general spectral features.

For example, as the interaction strength of the tag with the **3H** or **3D** is increased, the calculated harmonic or anharmonic frequencies of the IHB or IDB also increase. This pulls these excited states out of resonance with the excited states that are assigned as overtones and combination bands in Table S6. At the same time, the intensities of these two quanta transitions decrease with increasing tag strength. This loss of intensity in the two quanta transitions with increased tag strength indicates that these transitions are borrowing intensity from the bright H-bonded OH stretch vibration in **3H** where the excited states are close in energy. As the frequency of the H-bonded OH stretch shifts to higher energy, it moves out of resonance with these excited states, and their intensity drops, while the frequency of the transition remains roughly constant.

Based on the VPT2 calculations, the frequencies of the overtone and combination states reported in Table S6 shift by less than  $100\text{ cm}^{-1}$  when we consider the  $\text{D}_2$ ,  $\text{N}_2$  and CO tags on **3H**. This shift is much smaller than the corresponding shift in the IHB frequencies, which are more than  $300\text{ cm}^{-1}$ . While the magnitudes of the shifts are smaller in **3D** compared to **3H**, the relative shifts of the fundamental in the IDB compared to the combination bands follow the same trends as are described for **3H**. When the free OH in **3H** is replaced by a methyl or ethyl group, blue-shifts in the H-bonded OH stretches are found in both the measured spectrum and VPT2 results.



While not providing definitive assignments, the results of the VPT2 calculations support the experimental approach, taken in this study, in which we take advantage of the sensitivity of the frequency response of the H-bonded OH stretch vibrations to the environment. In doing so, we gather the frequency of the underlying OH stretch vibration by extrapolating the trends obtained as the interaction between the hydronium free OH with the tag is increased.

## Methods 2: DMC approaches for calculating band origin for H-bonded OH stretch

The anharmonic frequency of the H-bonded OH stretches in **3H** obtained from DMC is based on the DMC calculation described elsewhere.<sup>9</sup> The ensembles of walkers that were used to provide the probability amplitude in that study were first symmetrized by permuting the two equivalent H...OH<sub>2</sub> units, the two hydrogen atoms in the dangling waters and performing a reflection of the ion in the plane that contains the three O atoms. In this way, each walker is replaced by 16 energetically equivalent structures. The excited state energy is calculated based on this wave function using the approaches described in ref. 10-11. In that approach, we approximate the excited state in the H-bonded OH stretch of the hydronium core by

$$|\Psi_1\rangle \approx (q - \langle q \rangle)|\Psi_0\rangle \quad (\text{S1})$$

where  $q$  represents a linear combination of the internal displacement coordinates. The coefficients for this transformation are the eigenvectors of the matrix of second moments of the ground state probability amplitude evaluated in mass-weighted internal coordinates diagonalizing the matrix of second moments,  $\mathbf{M}^{(\text{MW})}$  in internal coordinates,

$$\mathbf{M}^{\text{MW}} = \mathbf{G}^{-\frac{1}{2}} \mathbf{M} \mathbf{G}^{-\frac{1}{2}} \quad (\text{S2})$$

where  $\mathbf{G}$  is the Wilson G-matrix<sup>12</sup> and

$$\mathbf{M}_{ij} = \langle (\mathbf{r}_i - \langle \mathbf{r}_i \rangle)(\mathbf{r}_j - \langle \mathbf{r}_j \rangle) \rangle \quad (\text{S3})$$

For this calculation, the twenty four internal coordinates that define the geometry of **3H** consist of: Seven OH bond lengths; Three HOH angles, one for each of the two water molecules and the angle involving the two H-bonded OH bonds in the hydronium core; Two OO distances between the oxygen atoms in each of the water molecules and the hydronium ion; The associated OOO angle; The orientation of the free OH bond in the hydronium core, which is defined using two spherical coordinates; Three Euler angles for each water molecule; Three Euler angles for the hydronium core. The Euler angles are based on a reference structure in which the hydronium ion is planar, and the water molecules are oriented to be perpendicular to the plane that contains the three oxygen atoms.

In this calculation, we focus on the collective coordinate,  $q$ , that most closely resembles the out-of-phase displacements of the two H-bonded OH stretching vibrations along the O-O bonds. Within this formalism,

$$v = \langle T \rangle_1 - \langle T \rangle_0 + \langle V \rangle_1 - \langle V \rangle_0 \quad (\text{S4})$$

where

$$\langle T \rangle_1 - \langle T \rangle_0 = \frac{n\hbar^2\alpha}{2m} \quad (S5)$$

$$\alpha = \frac{\langle q^2 \rangle}{\langle q^4 \rangle - \langle q^2 \rangle^2} \quad (S6)$$

and

$$\langle V \rangle_1 - \langle V \rangle_0 = \langle (q - \langle q \rangle)V(q - \langle q \rangle) \rangle_0 - \langle V \rangle_0 \quad (S7)$$

In the above expressions, the 0 and 1 subscripts represent averages over the ground or first excited state in  $q$ . Earlier studies on  $\text{H}_3\text{O}_2^-$  from ref. 10 and **2H** from ref. 11 showed that it provides an accurate representation of the frequency of the fundamentals in similar ions.

## References:

- (1) Duong, C. H.; Gorlova, O.; Yang, N.; Kelleher, P. J.; Johnson, M. A.; McCoy, A. B.; Yu, Q.; Bowman, J. M. Disentangling the Complex Vibrational Spectrum of the Protonated Water Trimer,  $\text{H}^+(\text{H}_2\text{O})_3$ , with Two-Color IR-IR Photodissociation of the Bare Ion and Anharmonic VSCF/VCI Theory. *J. Phys. Chem. Lett.* **2017**, *8*, 3782-3789.
- (2) Hunter, E. P.; Lias, S. G. Proton Affinity Evaluation. In *NIST Chemistry WebBook, NIST Standard Reference Database Number 69*, Linstrom, P. J.; Mallard, W. G., Eds. National Institute of Standards and Technology: Gaithersburg MD, 20899, 2019.
- (3) Douberly, G. E.; Walters, R. S.; Cui, J.; Jordan, K. D.; Duncan, M. A. Infrared Spectroscopy of Small Protonated Water Clusters,  $\text{H}^+(\text{H}_2\text{O})_n$  ( $n=2-5$ ): Isomers, Argon Tagging, and Deuteration. *J. Phys. Chem. A* **2010**, *114*, 4570-4579.
- (4) Wolke, C. T.; Fournier, J. A.; Dzugan, L. C.; Fagiani, M. R.; Odbadrakh, T. T.; Knorke, H.; Jordan, K. D.; McCoy, A. B.; Asmis, K. R.; Johnson, M. A. Spectroscopic Snapshots of the Proton-Transfer Mechanism in Water. *Science* **2016**, *354*, 1131-1135.
- (5) Dickenson, G. D.; Niu, M. L.; Salumbides, E. J.; Komasa, J.; Eikema, K. S. E.; Pachucki, K.; Ubachs, W. Fundamental Vibration of Molecular Hydrogen. *Phys. Rev. Lett.* **2013**, *110*, 193601.
- (6) Coblenz Society, I. Evaluated Infrared Reference Spectra. In *NIST Chemistry WebBook, NIST Standard Reference Database Number 69*, Linstrom, P. J.; Mallard, W. G., Eds. National Institute of Standards and Technology: Gaithersburg MD, 20899, 2019.
- (7) Lofthus, A.; Krupenie, P. H. Spectrum of Molecular Nitrogen. *J. Phys. Chem. Ref. Data* **1977**, *6*, 113-307.
- (8) Frisch, M. J.; Trucks, G. W.; Schlegel, H. B.; Scuseria, G. E.; Robb, M. A.; Cheeseman, J. R.; Scalmani, G.; Barone, V.; Petersson, G. A.; Nakatsuji, H., et al. *Gaussian 16 Rev. A.03*, Wallingford, CT, 2016.
- (9) Dzugan, L. C.; DiRisio, R. J.; Madison, L. R.; McCoy, A. B. Spectral Signatures of Proton Delocalization in  $\text{H}^+(\text{H}_2\text{O})_{n=1-4}$  Ions. *Faraday Discuss.* **2018**, *212*, 443-466.
- (10) McCoy, A. B.; Diken, E. G.; Johnson, M. A. Generating Spectra from Ground-State Wave Functions: Unraveling Anharmonic Effects in the  $\text{OH}^+\cdot\text{H}_2\text{O}$  Vibrational Predissociation Spectrum. *J. Phys. Chem. A* **2009**, *113*, 7346-7352.
- (11) Guasco, T. L.; Johnson, M. A.; McCoy, A. B. Unraveling Anharmonic Effects in the Vibrational Predissociation Spectra of  $\text{H}_5\text{O}_2^+$  and Its Deuterated Analogues. *J. Phys. Chem. A* **2011**, *115*, 5847-5858.
- (12) Wilson, E. B.; Decius, J. C.; Cross, P. C. *Molecular Vibrations: The Theory of Infrared and Raman Vibrational Spectra*. McGraw Hill: New York, 1955.
